# Supplementary material
Source: PubMed Central journal article supplement (PMC3329891)
Supplement: NIHMS340045-supplement-11.pdf [file NIHMS340045-supplement-11.pdf]

| <b>Primer Name</b>     | <b>Primer Sequence</b>                 | <b>Notes</b>                                                                     |
|------------------------|----------------------------------------|----------------------------------------------------------------------------------|
| MCI-F1                 | GGGATCCAAAAAATGCAGAAC                  | for original cloning of MCI from cDNA library                                    |
| MCI-R1                 | GCTCGAGCCGTTGTCATTCTT                  |                                                                                  |
| MCI-F2                 | GAAGGCCTTGATGCAGAACAGAAGG              | to clone MCI in frame with Myc tag                                               |
| MCI-R2                 | CCGCTCGAGAATTGGGAACCCATC               | to fuse MCI to HGR on 3' end                                                     |
| MCI-F3                 | CCTCGGGAATCAAGCAAAGCATCTG              | forward primer with Aval site to generate $\Delta$ 180-213 construct             |
|                        |                                        |                                                                                  |
|                        |                                        |                                                                                  |
| mMCI1 Stu F1           | GAAGGCCTAGGATGCAAGCGTGCGAGGGCAG        | to clone mMCI into myc tagged CS2 vector                                         |
| mMCI1 Xho R1           | CCGCTCGAGaGCTGGGGACCCAGCGGAATTTG       |                                                                                  |
| MT-mMCI Nhe F1         | CGGGATCCCGGGTAGCATGGAGCAAAGCTCATTCTG   | to clone mMCI into lentiviral vector                                             |
| MT-mMCI Sal R1         | CGCTCGAGACGCGTCTGACTCAGCTGGGGACCCAGCGG | to clone mMCI into lentiviral vector                                             |
| MT-mMCI Bcl F2         | GCCTGATCACGCAGTCTCCTGCCGAGCCC          | forward primer for making 3' half of mMCI for $\Delta$ 175-238 lentiviral vector |
| MT-mMCI Bcl R2         | CGGTGATCATCTCCGTTGGTGGTGGCGGC          | reverse primer for making 5' half of mMCI for $\Delta$ 175-238 lentiviral vector |
| mRT-PCR F              | CCTAGTGGTGATTCGTCCGCGTCCG              | forward primer for rt-pcr from MTEC cultures                                     |
| mRT-PCR R              | GGTATTCTCTATGAGAGCAGTC                 | reverse primer for rt-pcr from MTEC cultures                                     |
| mGAPDH F               | GACTTCAACAGCAACTCCAC                   | GAPDH forward primer for rt-pcr from MTEC cultures                               |
| mGAPDH R               | TCCACCACCCTGTTGCTGTA                   | GAPDH reverse primer for rt-pcr from MTEC cultures                               |
|                        |                                        |                                                                                  |
|                        |                                        |                                                                                  |
| <b>Morpholino Name</b> | <b>Morpholino Sequence</b>             |                                                                                  |
| MCI-MO <sup>SPL</sup>  | GTGCCAGTCACTCACCTGGTTGTTT              |                                                                                  |
| MCI-MO <sup>ATG</sup>  | AAAACGCTTTCCTTCTGTTCTGCAT              |                                                                                  |
| Control-MO             | CCTCTTACCTCAGTTACAATTTATA              |                                                                                  |

Table 1 Legend: Shown are the nucleotide sequences used to generate constructs, or to design morpholinos used in this study.
