# Supplementary material
Source: PubMed Central journal article supplement (PMC3329891)
Supplement: NIHMS340045-supplement-12.pdf [file NIHMS340045-supplement-12.pdf]

| Column | Probeset ID         | Gene Symbol | Gene Title                               | RefSeq       | p-value     | Fold-Change |
|--------|---------------------|-------------|------------------------------------------|--------------|-------------|-------------|
| 23300  | XI2.51456.1.S1_at   | ---         | ---                                      | ---          | 0.0437432   | 39.4923     |
| 5038   | XI2.15616.1.S1_at   | tekt2       | tektin 2 (testicular)                    | NM_001096211 | 0.0124408   | 25.9678     |
| 27237  | XI2.55428.1.S1_at   | foxj1.2     | forkhead box J1, gene 2                  | NM_001096421 | 0.0148935   | 20.4041     |
| 17604  | XI2.41899.1.S1_at   | fam154b     | family with sequence similarity 154 B    | NM_001093710 | 0.00228547  | 19.3115     |
| 15703  | XI2.33942.1.S1_at   | MGC131046   | Cyclin O                                 | NM_001096396 | 0.017057    | 19.3037     |
| 4393   | XI2.14955.1.A1_at   | ---         | ---                                      | ---          | 0.029102    | 18.9438     |
| 10673  | XI2.23696.1.S1_at   | tsga10      | testis specific, 10                      | ---          | 0.00377716  | 17.6298     |
| 12822  | XI2.2651.1.A1_at    | ---         | ---                                      | ---          | 0.0363674   | 17.6218     |
| 31708  | XI2.9077.1.S1_at    | MGC78960    | hypothetical protein MGC78960            | NM_001091603 | 0.0106166   | 16.2694     |
| 22574  | XI2.50818.1.S1_at   | ccno        | cyclin O                                 | NM_001096410 | 0.0174991   | 15.0693     |
| 27520  | XI2.55698.1.S1_at   | MCI         | hypothetical protein LOC100158359        | NM_001127804 | 0.0327364   | 14.7061     |
| 3310   | XI2.13768.1.A1_at   | ---         | ---                                      | ---          | 0.000172648 | 14.1659     |
| 22222  | XI2.50473.1.S1_at   | MGC130946   | centrin2                                 | NM_001096664 | 0.0118188   | 14.1255     |
| 21769  | XI2.49880.1.S1_at   | c11orf66    | chromosome 11 open reading frame 66      | NM_001095293 | 0.020659    | 13.9783     |
| 29223  | XI2.5987.1.S1_at    | cav-3       | caveolin-3                               | NM_001088827 | 0.0321872   | 13.7159     |
| 5034   | XI2.15612.1.A1_at   | bbs12       | Bardet-Biedl syndrome 12                 | NM_001099878 | 0.0171632   | 13.5396     |
| 9600   | XI2.21648.1.S1_at   | kit         | v-kit viral oncogene homolog             | NM_001085708 | 0.0119181   | 13.5085     |
| 2834   | XI2.13265.1.S1_at   | ---         | tubulin tyrosine ligase                  | ---          | 0.0084366   | 13.2239     |
| 22541  | XI2.50790.1.S1_at   | foxn4       | forkhead box N4                          | NM_001095652 | 0.0153259   | 13.1927     |
| 22671  | XI2.50895.2.A1_at   | ---         | ---                                      | ---          | 0.028485    | 12.2844     |
| 1046   | XI2.11087.1.S1_at   | efhc1       | EF-hand domain (C-terminal) containing 1 | NM_001092940 | 0.0265342   | 12.1065     |
| 4818   | XI2.15406.2.S1_at   | ---         | ---                                      | ---          | 0.0052457   | 12.0757     |
| 16054  | XI2.34501.1.S1_at   | foxj1a      | forkhead box protein J1-A                | NM_001090177 | 0.00549759  | 11.8603     |
| 16009  | XI2.34463.1.S1_at   | MGC68680    | hypothetical protein MGC68680            | NM_001089700 | 0.0056069   | 11.4223     |
| 5939   | XI2.16545.1.S1_at   | tekt4       | tektin 4                                 | NM_001095333 | 0.0276342   | 11.2703     |
| 21208  | XI2.4890.1.S1_at    | ccdc78      | coiled-coil domain containing 78         | NM_001094136 | 0.0264737   | 11.1762     |
| 19386  | XI2.47013.1.S1_at   | ---         | ---                                      | ---          | 0.0409036   | 10.7431     |
| 23893  | XI2.52048.1.A1_at   | ---         | ---                                      | ---          | 0.0109775   | 10.7379     |
| 22196  | XI2.50448.1.S1_at   | ---         | ---                                      | ---          | 0.0059126   | 10.6394     |
| 19346  | XI2.46981.1.S1_at   | c1orf158    | chromosome 1 open reading frame 158      | NM_001095298 | 0.0104278   | 10.2868     |
| 5603   | XI2.16202.1.S1_at   | ---         | ---                                      | ---          | 0.0103435   | 10.168      |
| 19501  | XI2.47124.1.S1_at   | ankrd5      | ankyrin repeat domain 5                  | NM_001091772 | 0.00782972  | 9.9975      |
| 17188  | ---                 | ---         | ---                                      | ---          | 0.00250837  | 9.99737     |
| 4923   | XI2.15506.1.A1_at   | fam166b     | family with sequence similarity 166 B    | NM_001112874 | 0.0146075   | 9.87313     |
| 21698  | XI2.49781.1.S1_at   | dna11       | dynein, axonemal, light chain 1          | NM_001094484 | 0.0319668   | 9.5289      |
| 23541  | XI2.51703.1.S1_at   | c2orf62     | chromosome 2 open reading frame 62       | NM_001096840 | 0.0191736   | 9.31112     |
| 19236  | XI2.46873.1.S1_at   | ttc18       | tetratricopeptide repeat domain 18       | ---          | 0.0449571   | 9.16799     |
| 6076   | XI2.16695.1.S1_at   | elovl2      | (FEN1/Elo2, SUR4/Elo3)-like 2            | NM_001094095 | 0.0382186   | 9.12043     |
| 30872  | XI2.7927.1.S1_at    | wdr8        | WD repeat domain 8                       | NM_001096522 | 0.0347115   | 8.91554     |
| 21923  | XI2.50146.1.A1_at   | ---         | ---                                      | ---          | 0.00767846  | 8.77527     |
| 26175  | XI2.54218.1.A1_at   | ---         | ---                                      | ---          | 0.016895    | 8.75101     |
| 21161  | XI2.48854.1.S1_a_at | ---         | ---                                      | ---          | 0.0207428   | 8.51722     |
| 5624   | XI2.16226.1.A1_at   | ---         | ---                                      | ---          | 0.0312996   | 8.51029     |
| 2018   | XI2.12380.1.S1_at   | ccdc19      | coiled-coil domain containing 19         | NM_001095394 | 0.00540275  | 8.49173     |
| 13882  | XI2.30.1.S1_at      | kit         | v-kit homolog                            | NM_001085579 | 0.00509678  | 8.40797     |
| 21843  | XI2.50027.1.S1_at   | spef2       | sperm flagellar 2                        | NM_001095399 | 0.0162176   | 8.33819     |
| 3365   | XI2.13831.2.A1_at   | ---         | ---                                      | ---          | 0.0444365   | 8.28793     |
| 2042   | XI2.1241.1.S1_at    | sox7        | SRY (sex determining region Y)-box 7     | NM_001085868 | 0.0369793   | 8.22495     |
| 8809   | XI2.20259.1.S1_at   | morn3       | MORN repeat containing 3                 | NM_001095332 | 0.0145923   | 8.17571     |
| 30924  | XI2.7994.1.A1_at    | ---         | ---                                      | ---          | 0.0299608   | 7.8482      |
| 16067  | XI2.34517.1.A1_at   | ---         | ---                                      | ---          | 0.0364137   | 7.82168     |
| 13891  | XI2.30012.1.S1_at   | tekt1       | tektin 1                                 | NM_001091757 | 0.0216221   | 7.44936     |
| 2177   | XI2.12567.1.A1_at   | ---         | ---                                      | ---          | 0.0142887   | 7.39464     |
| 8933   | XI2.20609.1.S1_at   | tctex1d1-a  | tctex1 domain-containing protein 1-A     | NM_001096648 | 0.00298875  | 7.35295     |

|       |                     |             |                                              |              |             |         |
|-------|---------------------|-------------|----------------------------------------------|--------------|-------------|---------|
| 22204 | XI2.50456.1.A1_at   | ---         | ---                                          | ---          | 0.00556426  | 7.28131 |
| 10301 | XI2.23166.1.S1_at   | tmem53-b    | transmembrane protein 53                     | NM_001093021 | 0.00160528  | 7.27875 |
| 14494 | XI2.32096.1.S1_at   | enkur       | enkurin, TRPC channel interacting protein    | NM_001095267 | 0.0118146   | 7.17614 |
| 31782 | XI2.9162.1.S1_at    | ttc21a      | tetratricopeptide repeat domain 21A          | NM_001091636 | 0.0388703   | 7.15609 |
| 29876 | XI2.6788.1.S1_at    | LOC496230   | UPF0573 protein B                            | NM_001095416 | 0.0175056   | 7.06311 |
| 31537 | XI2.8912.1.S1_at    | grasp       | GRP1-associated scaffold protein             | NM_001085984 | 0.0260989   | 7.00711 |
| 5991  | XI2.16599.1.S1_at   | MGC80975    | MGC80975 protein                             | NM_001092408 | 0.0423871   | 6.93597 |
| 2909  | XI2.13352.1.S1_at   | rsph1       | radial spoke head 1 homolog                  | NM_001095320 | 0.0156417   | 6.90444 |
| 27296 | XI2.55482.1.S1_at   | ccdc113     | coiled-coil domain containing 113            | ---          | 0.0452484   | 6.86065 |
| 13350 | XI2.2908.1.A1_at    | ---         | ---                                          | ---          | 0.0174418   | 6.8468  |
| 5520  | XI2.16114.1.S1_at   | ---         | ---                                          | ---          | 0.00909755  | 6.81848 |
| 14393 | XI2.3198.1.S1_at    | c13orf26    | chromosome 13 open reading frame 26          | NM_001095256 | 0.0297405   | 6.78483 |
| 30237 | XI2.7193.1.S1_at    | ---         | ---                                          | ---          | 0.0190573   | 6.6378  |
| 1430  | XI2.11546.1.A1_at   | ---         | ---                                          | ---          | 0.00740311  | 6.63436 |
| 15434 | XI2.33617.1.A1_at   | ---         | ---                                          | ---          | 0.00689346  | 6.62174 |
| 7928  | XI2.19135.1.S1_at   | ---         | ---                                          | ---          | 0.00301495  | 6.53265 |
| 2067  | XI2.12436.1.A1_at   | ---         | ---                                          | ---          | 0.0197631   | 6.50189 |
| 3485  | XI2.1396.1.S1_at    | foxj1       | forkhead box J1                              | NM_001090175 | 0.0112107   | 6.44648 |
| 30067 | XI2.7007.1.S1_at    | poc1a       | POC1 centriolar protein homolog A            | NM_001086414 | 0.00248602  | 6.42153 |
| 26490 | XI2.54538.1.S1_at   | ---         | ---                                          | ---          | 0.0305946   | 6.37087 |
| 21898 | XI2.50128.1.S1_at   | lrrc67      | leucine rich repeat containing 67            | NM_001095321 | 0.012322    | 6.34559 |
| 2497  | XI2.12902.1.A1_at   | ---         | ---                                          | ---          | 0.00171016  | 6.3427  |
| 5027  | XI2.15603.1.A1_at   | ---         | ---                                          | ---          | 0.0417029   | 6.18644 |
| 24075 | XI2.52195.1.S1_at   | ---         | ---                                          | ---          | 0.00701737  | 6.1654  |
| 20905 | XI2.48614.1.S1_at   | efcab1      | EF-hand calcium binding domain 1             | NM_001096226 | 0.0134406   | 6.04893 |
| 12123 | XI2.25505.1.A1_at   | MGC84778    | MGC84778 protein                             | NM_001092848 | 0.00839975  | 6.0201  |
| 7601  | XI2.18686.1.A1_at   | ---         | ---                                          | ---          | 0.000421412 | 5.99943 |
| 27233 | XI2.55424.1.S1_at   | MGC130930   | hypothetical protein MGC130930               | NM_001096367 | 0.0362181   | 5.96315 |
| 4471  | XI2.1504.1.A1_at    | rsph3       | radial spoke 3 homolog                       | NM_001127814 | 0.0134057   | 5.8542  |
| 20862 | XI2.48559.1.S1_at   | c4orf47     | chromosome 4 open reading frame 47           | NM_001094745 | 0.0263804   | 5.8476  |
| 9372  | XI2.21493.1.S1_at   | hsp70       | heat shock 70kDa protein                     | NM_001127675 | 0.0259389   | 5.74419 |
| 27763 | XI2.5593.1.S1_at    | MGC131354   | hypothetical protein MGC131354               | NM_001096328 | 0.0164894   | 5.73295 |
| 25886 | XI2.53906.1.S1_at   | tbcel       | tubulin folding cofactor E-like              | NM_001096263 | 0.00793291  | 5.71029 |
| 6135  | XI2.16772.1.S1_at   | dnali1      | dynein, axonemal, light intermediate chain 1 | NM_001092504 | 0.0166189   | 5.674   |
| 14497 | XI2.32099.1.S1_at   | ---         | ---                                          | ---          | 0.0157209   | 5.51393 |
| 32177 | XI2.9637.1.A1_at    | ---         | ---                                          | ---          | 0.0212796   | 5.49621 |
| 31068 | XI2.8193.1.S1_a_at  | fam161a     | family with sequence similarity 161A         | NM_001094135 | 0.0315916   | 5.42    |
| 25775 | XI2.53803.1.S1_x_at | alphatub84b | tubulin, alpha 1                             | NM_001086587 | 0.00163651  | 5.36767 |
| 10088 | XI2.22601.1.S1_at   | LOC496239   | hypothetical LOC496239                       | NM_001095424 | 0.00995546  | 5.35343 |
| 12325 | XI2.25762.1.A1_at   | MGC154819   | rieske domain protein (5K704)                | NM_001096967 | 0.00118107  | 5.33314 |
| 13969 | XI2.3026.1.S1_at    | ak7         | adenylate kinase 7                           | NM_001087577 | 0.0483428   | 5.29683 |
| 846   | XI2.10830.1.S1_a_at | c9orf68     | chromosome 9 open reading frame 68           | NM_001096282 | 0.0081382   | 5.28235 |
| 22000 | XI2.50244.1.A1_at   | ---         | ---                                          | ---          | 0.0320162   | 5.25955 |
| 21885 | XI2.50116.1.S1_at   | zmynd10     | zinc finger, MYND-type containing 10         | NM_001096803 | 0.00105248  | 5.22893 |
| 19217 | XI2.46857.1.S1_at   | c2orf73     | chromosome 2 open reading frame 73           | ---          | 0.0102017   | 5.22128 |
| 16525 | XI2.35387.1.S1_at   | morn2       | MORN repeat containing 2                     | NM_001171791 | 0.00378051  | 5.17837 |
| 4362  | XI2.14916.1.A1_at   | ---         | ---                                          | ---          | 0.0451372   | 5.1507  |
| 730   | XI2.10706.1.A1_at   | tctex1d1    | Tctex1 domain containing 1                   | NM_001113430 | 0.0119346   | 4.99307 |
| 21844 | XI2.50028.1.S1_at   | lrrc18      | leucine rich repeat containing 18            | NM_001095397 | 0.0319065   | 4.95714 |
| 2347  | XI2.12748.1.S1_at   | ---         | ---                                          | ---          | 0.0465248   | 4.88995 |
| 2882  | XI2.13320.1.A1_at   | ---         | ---                                          | ---          | 0.0107002   | 4.88707 |
| 16335 | XI2.34888.1.S1_at   | ---         | ---                                          | ---          | 0.027676    | 4.87608 |
| 4629  | XI2.15197.1.S1_at   | ---         | ---                                          | ---          | 0.0292191   | 4.87578 |
| 4817  | XI2.15406.1.S1_at   | ---         | ---                                          | ---          | 0.0200187   | 4.82485 |

|       |                     |              |                                       |              |             |         |
|-------|---------------------|--------------|---------------------------------------|--------------|-------------|---------|
| 3215  | XI2.13667.2.S1_a_at | ---          | ---                                   | ---          | 0.0327275   | 4.77905 |
| 27977 | XI2.5614.1.S1_at    | meig1        | meiosis expressed gene 1 homolog      | NM_001171698 | 0.0066859   | 4.76942 |
| 3467  | XI2.13942.1.A1_at   | ---          | ---                                   | ---          | 0.0292812   | 4.73313 |
| 27010 | XI2.55178.1.A1_at   | ---          | ---                                   | ---          | 0.0489272   | 4.71171 |
| 21908 | XI2.50135.1.A1_at   | ---          | ---                                   | ---          | 0.0159065   | 4.70762 |
| 22670 | XI2.50895.1.S1_at   | ---          | ---                                   | ---          | 0.0158643   | 4.67842 |
| 29556 | XI2.6402.1.S1_at    | MGC130955    | hypothetical protein MGC130955        | NM_001096370 | 0.00500138  | 4.6686  |
| 4344  | XI2.14895.1.A1_at   | ---          | ---                                   | ---          | 0.00897859  | 4.6428  |
| 21218 | XI2.48920.1.S1_at   | hspb11       | heat shock protein family             | NM_001094357 | 0.0220473   | 4.58453 |
| 21744 | XI2.49841.1.S1_at   | ccdc103      | coiled-coil domain containing 103     | ---          | 0.00693798  | 4.56838 |
| 16668 | XI2.3668.2.S1_at    | fbxo43       | F-box protein 43                      | NM_001099868 | 0.0109577   | 4.53102 |
| 11184 | XI2.24257.1.S1_at   | c2orf39      | chromosome 2 open reading frame 39    | NM_001086371 | 0.0112789   | 4.48481 |
| 8843  | XI2.20476.1.S1_at   | ccdc89       | coiled-coil domain containing 89      | NM_001089115 | 0.0017473   | 4.45102 |
| 11200 | XI2.24281.1.S1_at   | MGC82579     | MGC82579 protein                      | NM_001092129 | 0.0208054   | 4.42577 |
| 23153 | XI2.51303.1.S1_at   | spata18      | spermatogenesis associated 18 homolog | NM_001096182 | 0.0304162   | 4.41511 |
| 22482 | XI2.50705.1.S1_at   | ---          | ---                                   | ---          | 0.0219169   | 4.3868  |
| 731   | XI2.10706.2.S1_at   | tctex1d1     | Tctex1 domain containing 1            | NM_001113430 | 0.00285669  | 4.31463 |
| 28894 | XI2.57009.1.A1_at   | ---          | ---                                   | ---          | 0.00286977  | 4.29083 |
| 19149 | XI2.46798.1.S1_at   | c9orf9       | chromosome 9 open reading frame 9     | NM_001091855 | 0.0303013   | 4.28851 |
| 4479  | XI2.1505.2.A1_at    | ---          | ---                                   | ---          | 0.0183158   | 4.27718 |
| 21983 | XI2.50223.1.S1_at   | zdhhc1       | zinc finger, DHHC-type containing 1   | NM_001096323 | 0.0065544   | 4.26892 |
| 3792  | XI2.14290.1.A1_at   | ---          | ---                                   | ---          | 0.00992844  | 4.24001 |
| 29074 | XI2.5789.1.S1_at    | pde9a        | phosphodiesterase 9A                  | NM_001096172 | 0.0194558   | 4.21313 |
| 4448  | XI2.15012.1.A1_a_at | LOC100049756 | hypothetical protein LOC100049756     | ---          | 0.0175902   | 4.204   |
| 8139  | XI2.19374.1.S1_at   | ---          | ---                                   | ---          | 0.000125097 | 4.16254 |
| 16805 | XI2.3778.2.A1_a_at  | ---          | ---                                   | ---          | 0.00102794  | 4.10518 |
| 27819 | XI2.55981.1.S1_at   | tppp3        | tubulin polymerization-promoting      | NM_001096362 | 0.0042442   | 4.0959  |
| 22508 | XI2.50729.1.S1_at   | ---          | ---                                   | ---          | 0.0378548   | 4.07804 |
| 5305  | XI2.15885.1.S1_at   | LOC496226    | hypothetical LOC496226                | NM_001095413 | 0.0432764   | 4.06973 |
| 2305  | XI2.12692.1.S1_at   | dcdc2        | doublecortin domain containing 2      | ---          | 0.0197363   | 4.04431 |
| 27888 | XI2.56044.2.A1_at   | fsp1         | Fibrous sheath-interacting protein 1  | ---          | 0.0337105   | 4.04183 |
| 13092 | XI2.2815.1.S1_at    | katnb1       | katanin p80 subunit B 1               | NM_001088285 | 0.00470087  | 3.99212 |
| 2329  | XI2.12719.1.S1_at   | mapk15       | mitogen-activated protein kinase 15   | NM_001095966 | 0.0242038   | 3.97558 |
| 7354  | XI2.18412.1.S1_at   | ---          | ---                                   | ---          | 0.0270073   | 3.97279 |
| 30036 | XI2.6973.1.S1_at    | dynlrb2      | dynein, light chain, roadblock-type 2 | NM_001097940 | 0.0323785   | 3.95645 |
| 22622 | XI2.50855.1.S1_at   | ---          | ---                                   | ---          | 0.00418583  | 3.95338 |
| 2085  | XI2.12454.1.A1_at   | ---          | ---                                   | ---          | 0.00197276  | 3.94835 |
| 1326  | XI2.11440.1.A1_at   | ---          | ---                                   | ---          | 0.0180401   | 3.93364 |
| 8837  | XI2.20447.1.S1_at   | MGC52862     | similar to tektin 2 (testicular)      | NM_001085998 | 0.00929947  | 3.88768 |
| 21311 | XI2.49030.1.S1_at   | LOC100127299 | Hypothetical protein LOC100127299     | NM_001112868 | 0.00505602  | 3.87709 |
| 7721  | XI2.18853.1.S1_at   | dydc1        | DPY30 domain containing 1             | ---          | 0.00535572  | 3.86225 |
| 1614  | XI2.11915.1.A1_at   | ---          | ---                                   | ---          | 0.0236722   | 3.84522 |
| 14424 | XI2.32014.1.A1_at   | ---          | ---                                   | ---          | 0.0180341   | 3.82213 |
| 4953  | XI2.15538.1.A1_at   | ---          | ---                                   | ---          | 0.0241865   | 3.82204 |
| 14904 | XI2.32598.1.S1_at   | ccdc41       | coiled-coil domain containing 41      | NM_001095958 | 0.0256201   | 3.80601 |
| 19292 | XI2.46928.1.A1_a_at | ---          | ---                                   | ---          | 0.00521959  | 3.80143 |
| 22784 | XI2.50997.1.S1_at   | ---          | ---                                   | ---          | 0.00292188  | 3.78892 |
| 4893  | XI2.15473.1.A1_at   | ---          | ---                                   | ---          | 0.00562207  | 3.76573 |
| 5560  | XI2.16163.1.A1_at   | ---          | ---                                   | ---          | 0.00267005  | 3.75791 |
| 29508 | XI2.6356.1.A1_at    | ---          | ---                                   | ---          | 0.00312159  | 3.75548 |
| 3366  | XI2.13831.3.S1_at   | ---          | ---                                   | ---          | 0.0334568   | 3.73119 |
| 7839  | XI2.19005.2.A1_at   | ---          | ---                                   | ---          | 0.0355335   | 3.70936 |
| 2767  | XI2.13179.1.A1_at   | ---          | ---                                   | ---          | 0.0388817   | 3.70108 |
| 32384 | XI2.9878.1.A1_at    | ---          | ---                                   | ---          | 0.00861146  | 3.67989 |

|       |                     |              |                                              |              |             |         |
|-------|---------------------|--------------|----------------------------------------------|--------------|-------------|---------|
| 25688 | XI2.53719.1.A1_at   | ---          | ---                                          | ---          | 0.0441477   | 3.65758 |
| 4348  | XI2.14899.1.S1_at   | ccdc61       | coiled-coil domain containing 61             | NM_001096129 | 0.00724111  | 3.62546 |
| 5202  | XI2.15778.1.S1_at   | ---          | ---                                          | ---          | 0.0120602   | 3.62373 |
| 18271 | XI2.4468.1.S1_at    | c21orf59     | chromosome 21 open reading frame 59          | NM_001093382 | 0.0198472   | 3.60673 |
| 21657 | XI2.49716.1.S1_at   | ---          | ---                                          | ---          | 0.0111519   | 3.59209 |
| 30057 | XI2.6997.1.S1_at    | cep76        | centrosomal protein 76kDa                    | NM_001093268 | 0.0206297   | 3.56949 |
| 4532  | XI2.15107.2.S1_at   | ---          | ---                                          | ---          | 0.0348026   | 3.56435 |
| 25673 | XI2.53704.1.S1_at   | fam166b      | family with sequence similarity 166B         | NM_001112874 | 0.00734357  | 3.55934 |
| 3650  | XI2.14126.1.A1_at   | LOC100137623 | hypothetical protein LOC100137623            | ---          | 0.0473345   | 3.55656 |
| 4720  | XI2.15295.1.A1_at   | ---          | ---                                          | ---          | 0.0147642   | 3.54979 |
| 22487 | XI2.50709.1.S1_at   | ---          | ---                                          | ---          | 0.0134812   | 3.53433 |
| 20169 | XI2.47812.1.A1_at   | ---          | ---                                          | ---          | 0.0085748   | 3.53098 |
| 10205 | XI2.22889.1.A1_at   | ---          | ---                                          | ---          | 0.00411775  | 3.50058 |
| 2768  | XI2.13179.2.S1_at   | ---          | ---                                          | ---          | 0.0283086   | 3.49548 |
| 1361  | XI2.11474.1.A1_at   | ---          | ---                                          | ---          | 0.0276951   | 3.48228 |
| 4801  | XI2.15384.1.S1_at   | rsph9        | radial spoke head 9 homolog                  | NM_001096314 | 0.00117608  | 3.46226 |
| 21234 | XI2.4896.1.A1_at    | ---          | ---                                          | ---          | 0.00533392  | 3.45043 |
| 15545 | XI2.33765.2.A1_at   | ---          | ---                                          | ---          | 0.00868042  | 3.44786 |
| 24313 | XI2.5242.1.S1_at    | ---          | ---                                          | ---          | 0.00870645  | 3.4409  |
| 6979  | XI2.17979.1.S1_at   | fbxw9        | F-box and WD repeat domain containing 9      | NM_001095104 | 0.00509669  | 3.43261 |
| 4531  | XI2.15107.1.A1_at   | ---          | ---                                          | ---          | 0.028586    | 3.38795 |
| 20153 | XI2.47790.1.A1_at   | map9         | microtubule-associated protein 9             | NM_001135083 | 0.0443962   | 3.3631  |
| 32140 | XI2.9586.1.A1_at    | ---          | ---                                          | ---          | 0.0118474   | 3.36106 |
| 6995  | XI2.17997.1.S1_at   | nme5         | non-metastatic cells 5,                      | NM_001094325 | 0.000348802 | 3.35499 |
| 31917 | XI2.9307.1.A1_at    | ---          | ---                                          | ---          | 0.0369663   | 3.31553 |
| 15863 | XI2.34137.1.S1_at   | tmem107      | transmembrane protein 107                    | NM_001096639 | 0.0429918   | 3.28513 |
| 21905 | XI2.50133.1.S1_at   | cluap1       | clusterin associated protein 1               | NM_001096997 | 0.0414825   | 3.28473 |
| 17527 | XI2.41634.1.S1_at   | ---          | ---                                          | ---          | 0.0369187   | 3.27792 |
| 4432  | XI2.14992.1.S1_at   | adrb1        | adrenergic, beta-1-, receptor                | NM_001090683 | 0.00402203  | 3.27067 |
| 22436 | XI2.50660.1.S1_at   | ---          | ---                                          | ---          | 0.00754443  | 3.26597 |
| 10048 | XI2.22500.2.S1_at   | ---          | ---                                          | ---          | 0.0271428   | 3.22273 |
| 5938  | XI2.16544.1.S1_at   | ropon1l      | ropporin 1-like                              | NM_001096022 | 0.0395763   | 3.21842 |
| 7112  | XI2.18143.1.A1_at   | ---          | ---                                          | ---          | 0.00412232  | 3.21254 |
| 11532 | XI2.24665.1.S1_at   | fam177a1     | family with sequence similarity 177          | NM_001093442 | 0.0302837   | 3.20831 |
| 7622  | XI2.18707.1.A1_at   | ---          | ---                                          | ---          | 0.0268119   | 3.20367 |
| 21759 | XI2.49864.1.S1_at   | cyb5d1       | cytochrome b5 domain containing 1            | NM_001095358 | 0.0252493   | 3.20342 |
| 30571 | XI2.7581.1.A1_at    | ---          | ---                                          | ---          | 0.0087326   | 3.1878  |
| 22030 | XI2.50278.1.A1_at   | ---          | ---                                          | ---          | 0.044593    | 3.17827 |
| 29218 | XI2.598.2.S1_a_at   | LOC100137612 | RaiB-binding protein                         | NM_001114768 | 0.00532586  | 3.15692 |
| 7729  | XI2.18865.1.S1_at   | ankrd45      | ankyrin repeat domain 45                     | NM_001095276 | 0.0236915   | 3.14263 |
| 14491 | XI2.32093.1.S1_at   | styx1l       | serine/threonine/tyrosine interacting-like 1 | NM_001112823 | 0.0158346   | 3.13841 |
| 1230  | XI2.11326.1.A1_at   | ---          | ---                                          | ---          | 0.0254898   | 3.13147 |
| 22452 | XI2.50676.1.S1_at   | MGC131269    | hypothetical protein MGC131269               | NM_001096298 | 0.0370739   | 3.10646 |
| 5843  | XI2.16441.1.S1_at   | wdr16        | WD repeat domain 16                          | NM_001095991 | 0.0205917   | 3.10544 |
| 9754  | XI2.21906.1.S1_at   | MGC53997     | hypothetical protein MGC53997                | NM_001086046 | 0.0124281   | 3.1034  |
| 7576  | XI2.18655.1.A1_at   | ---          | ---                                          | ---          | 0.0446853   | 3.06381 |
| 10671 | XI2.23694.1.S1_at   | paqr8        | progesterone and adipoQ receptor             | NM_001085861 | 0.00983051  | 3.05876 |
| 4498  | XI2.1507.1.S1_at    | ttc25        | tetratricopeptide repeat domain 25           | NM_001091143 | 0.0250721   | 3.05198 |
| 20615 | XI2.48341.1.S1_at   | acyp1        | acylphosphatase 1                            | NM_001093244 | 0.00350934  | 3.05172 |
| 25988 | XI2.53987.1.S1_at   | dnai2        | dynein, axonemal, intermediate chain 2       | NM_001096041 | 0.0267522   | 3.04577 |
| 24276 | XI2.52384.2.S1_s_at | tbcel        | tubulin folding cofactor E-like              | NM_001096263 | 0.00442192  | 3.04154 |
| 21789 | XI2.49913.1.S1_at   | ppil6        | peptidylprolyl isomerase 6                   | NM_001095206 | 0.00408559  | 3.02166 |
| 15325 | XI2.33489.1.S1_x_at | ---          | ---                                          | ---          | 0.00302158  | 3.01153 |
| 463   | XI2.10381.1.S1_at   | rage         | renal tumor antigen                          | NM_001091332 | 0.0160438   | 3.00399 |

|       |                     |           |                                             |              |             |         |
|-------|---------------------|-----------|---------------------------------------------|--------------|-------------|---------|
| 27333 | XI2.55518.1.A1_s_at | ift80     | intraflagellar transport 80 homolog         | ---          | 0.047283    | 2.99779 |
| 19338 | XI2.46973.1.S1_at   | ---       | ---                                         | ---          | 0.0139021   | 2.99765 |
| 21971 | XI2.50209.1.S1_at   | iqcd      | IQ motif containing D                       | ---          | 0.0496283   | 2.99625 |
| 8517  | XI2.19820.1.A1_at   | ---       | ---                                         | ---          | 0.0104687   | 2.97749 |
| 13814 | XI2.29831.1.S1_at   | oscp1     | organic solute carrier partner 1            | NM_001095812 | 0.000268336 | 2.9646  |
| 3672  | XI2.14154.1.S1_at   | ---       | ---                                         | ---          | 0.0346776   | 2.96316 |
| 19293 | XI2.46928.1.A1_s_at | spag6     | sperm associated antigen 6                  | NM_001096217 | 0.0293709   | 2.94158 |
| 447   | XI2.10353.1.S1_at   | ---       | ---                                         | ---          | 0.0106676   | 2.92793 |
| 14114 | XI2.30772.1.A1_at   | ---       | ---                                         | ---          | 0.00208099  | 2.9064  |
| 11592 | XI2.24734.1.S1_a_at | arl2bp    | ADP-ribosylation factor binding protein     | NM_001092856 | 0.0278399   | 2.90379 |
| 5233  | XI2.15806.3.A1_at   | ---       | ---                                         | ---          | 0.0418996   | 2.90313 |
| 24322 | XI2.52433.1.S1_at   | ---       | ---                                         | ---          | 0.0321495   | 2.87357 |
| 4326  | XI2.14868.1.A1_at   | ---       | ---                                         | ---          | 0.0049692   | 2.85981 |
| 15297 | XI2.334.1.S1_at     | xicl      | Xicl gene                                   | NM_001088319 | 0.0112724   | 2.8333  |
| 25718 | XI2.53747.1.A1_at   | ---       | ---                                         | ---          | 0.0308837   | 2.80646 |
| 1324  | XI2.11439.1.S1_at   | c16orf48  | chromosome 16 open reading frame 48         | ---          | 0.0106164   | 2.79466 |
| 31417 | XI2.8720.2.A1_s_at  | giyd1     | GIY-YIG domain containing 1                 | NM_001096907 | 0.0127051   | 2.79039 |
| 4557  | XI2.15133.1.S1_at   | wdr78     | WD repeat domain 78                         | NM_001092231 | 0.00860769  | 2.77075 |
| 4904  | XI2.1549.1.A1_at    | ---       | ---                                         | ---          | 0.0469432   | 2.76328 |
| 4715  | XI2.15290.1.A1_at   | ---       | ---                                         | ---          | 0.0240036   | 2.76187 |
| 5231  | XI2.15806.1.A1_at   | ---       | ---                                         | ---          | 0.0341287   | 2.74066 |
| 8229  | XI2.19478.1.S1_at   | LOC398327 | Leucine-rich protein                        | NM_001088793 | 0.00371791  | 2.73739 |
| 19392 | XI2.47019.1.S1_at   | MGC78844  | hypothetical protein MGC78844               | NM_001091575 | 0.0475398   | 2.73358 |
| 20445 | XI2.48175.1.A1_at   | tctn1     | tectonic family member 1                    | ---          | 0.0195683   | 2.73172 |
| 1416  | XI2.11534.1.S1_at   | ccdc45    | coiled-coil domain containing 45            | NM_001094269 | 0.0262645   | 2.72514 |
| 19343 | XI2.46978.1.S1_at   | fam164a   | family with sequence similarity 164A        | NM_001095330 | 0.00376864  | 2.72433 |
| 15641 | XI2.33872.1.S1_at   | gmppaa    | GDP-mannose pyrophosphorylase A a           | NM_001092574 | 0.0197683   | 2.71427 |
| 30095 | XI2.7038.1.S1_at    | stil      | SCL/TAL1 interrupting locus                 | NM_001091352 | 0.00783978  | 2.69493 |
| 17323 | XI2.40998.1.A1_at   | ---       | ---                                         | ---          | 0.0160091   | 2.69207 |
| 24372 | XI2.52481.1.S1_at   | ---       | ---                                         | ---          | 0.0464603   | 2.69054 |
| 11615 | XI2.24758.1.S1_at   | bbs5      | Bardet-Biedl syndrome 5                     | NM_001094313 | 0.020913    | 2.67345 |
| 3450  | XI2.13927.1.A1_at   | ---       | ---                                         | ---          | 0.025805    | 2.66834 |
| 4891  | XI2.15467.1.S1_at   | cep70     | centrosomal protein 70kDa                   | NM_001095745 | 0.00631455  | 2.6556  |
| 14270 | XI2.3143.1.A1_at    | ---       | ---                                         | ---          | 0.0229752   | 2.65421 |
| 2258  | XI2.12647.1.A1_at   | ---       | ---                                         | ---          | 0.00548254  | 2.64362 |
| 22026 | XI2.50273.1.A1_at   | ---       | ---                                         | ---          | 0.00714586  | 2.63996 |
| 31562 | XI2.8933.1.A1_at    | ---       | ---                                         | ---          | 0.0196943   | 2.63937 |
| 15474 | XI2.33666.1.S1_at   | tsga14    | testis specific, 14                         | NM_001091191 | 0.0469745   | 2.63511 |
| 29444 | XI2.627.1.S1_at     | six3      | SIX homeobox 3                              | NM_001085702 | 0.045936    | 2.63425 |
| 5801  | XI2.16400.1.S1_at   | wdr92     | WD repeat domain 92                         | NM_001095400 | 0.0113546   | 2.63067 |
| 24323 | XI2.52433.2.A1_at   | ---       | ---                                         | ---          | 0.00179181  | 2.61514 |
| 16319 | XI2.34867.1.S1_at   | ---       | ---                                         | ---          | 0.0250045   | 2.61417 |
| 412   | XI2.10313.1.A1_at   | ---       | ---                                         | ---          | 0.0122942   | 2.6028  |
| 22477 | XI2.50701.1.S1_at   | ---       | ---                                         | ---          | 0.0270132   | 2.57462 |
| 1327  | XI2.11440.2.S1_at   | ---       | ---                                         | ---          | 0.0343579   | 2.55452 |
| 21857 | XI2.50052.1.S1_at   | hvcn1     | hydrogen voltage-gated channel 1            | NM_001095406 | 0.022652    | 2.54857 |
| 21783 | XI2.49909.1.S1_at   | c9orf96   | chromosome 9 open reading frame 96          | NM_001095209 | 0.0291666   | 2.54834 |
| 3996  | XI2.14517.1.S1_at   | lrrcc1    | leucine rich repeat and coiled-coil domains | NM_001091416 | 0.000267806 | 2.54587 |
| 7838  | XI2.19005.1.A1_s_at | wdr54     | D3Mm3e protein                              | NM_001096867 | 0.0460423   | 2.53747 |
| 27374 | XI2.55563.1.S1_at   | ---       | ---                                         | ---          | 0.00599046  | 2.53313 |
| 646   | XI2.10608.1.S1_at   | cspp1     | centrosome associated protein 1             | ---          | 0.0365307   | 2.53188 |
| 28895 | XI2.57009.2.S1_a_at | ---       | ---                                         | ---          | 0.028691    | 2.52008 |
| 12502 | XI2.26052.1.S1_at   | ift52     | intraflagellar transport 52 homolog         | NM_001094130 | 0.0167209   | 2.50769 |
| 27094 | XI2.55263.1.A1_s_at | ---       | ---                                         | ---          | 0.023339    | 2.50519 |
| 6376  | XI2.17266.1.S1_at   | ---       | ---                                         | ---          | 0.0279247   | 2.50466 |

|       |                     |             |                                          |              |             |         |
|-------|---------------------|-------------|------------------------------------------|--------------|-------------|---------|
| 1896  | XI2.12240.1.A1_at   | ---         | ---                                      | ---          | 0.0207279   | 2.49753 |
| 626   | XI2.10588.1.A1_a_at | plk1s1      | polo-like kinase 1 substrate 1           | ---          | 0.0108184   | 2.49056 |
| 5354  | XI2.15925.1.S2_at   | dysx1c1     | dyslexia susceptibility 1 candidate 1    | NM_001093395 | 0.00547077  | 2.48855 |
| 8652  | XI2.19973.1.A1_at   | ---         | ---                                      | ---          | 0.0146678   | 2.47833 |
| 10135 | XI2.22719.1.S1_at   | slc30a1     | solute carrier family 30                 | NM_001087304 | 0.0294438   | 2.46685 |
| 27253 | XI2.55442.1.S1_at   | ribc2       | RIB43A domain with coiled-coils 2        | NM_001096247 | 0.0263839   | 2.44775 |
| 2984  | XI2.13433.1.A1_at   | mks1        | Meckel syndrome, type 1                  | NM_001097121 | 0.01113     | 2.44456 |
| 6724  | XI2.1768.1.S1_at    | cdk7        | cyclin-dependent kinase 7                | NM_001090892 | 0.00921702  | 2.43382 |
| 4701  | XI2.15277.1.A1_at   | ---         | ---                                      | ---          | 0.00364861  | 2.42524 |
| 29567 | XI2.6412.1.A1_at    | ---         | ---                                      | ---          | 0.0214099   | 2.41435 |
| 7173  | XI2.18207.1.S1_at   | MGC53012    | similar to Fyn proto-oncogene            | NM_001086013 | 0.0206907   | 2.39497 |
| 10328 | XI2.23201.1.A1_s_at | ---         | ---                                      | ---          | 0.0430293   | 2.3879  |
| 25867 | XI2.53895.1.A1_a_at | ---         | ---                                      | ---          | 0.00352031  | 2.38686 |
| 24612 | XI2.5273.1.S1_at    | ccdc52      | coiled-coil domain containing 52         | NM_001093122 | 0.0327136   | 2.38075 |
| 8428  | XI2.19695.1.A1_at   | ---         | ---                                      | ---          | 0.00711945  | 2.36706 |
| 21948 | XI2.50182.1.A1_at   | ---         | ---                                      | ---          | 0.0313371   | 2.36582 |
| 4321  | XI2.14862.1.A1_at   | ---         | ---                                      | ---          | 0.0245348   | 2.36354 |
| 15038 | XI2.32764.1.A1_at   | ---         | ---                                      | ---          | 0.0229635   | 2.35985 |
| 32542 | XI2Affx.136.1.S1_at | phospho2    | phosphatase, orphan 2                    | NM_001096935 | 0.0201443   | 2.3592  |
| 21999 | XI2.50243.1.S1_at   | katnal2     | katanin p60 subunit A-like 2             | NM_001096313 | 0.00319868  | 2.34871 |
| 25360 | XI2.53401.1.S1_at   | ---         | ---                                      | ---          | 0.01165     | 2.3416  |
| 7018  | XI2.18021.1.A1_at   | ---         | ---                                      | ---          | 0.0235788   | 2.34022 |
| 2338  | XI2.12736.1.S1_at   | heatr6      | HEAT repeat containing 6                 | NM_001086044 | 0.0307357   | 2.33754 |
| 14678 | XI2.32305.2.A1_at   | ---         | ---                                      | ---          | 0.0301154   | 2.33473 |
| 25557 | XI2.53590.1.S1_at   | ankrd42     | ankyrin repeat domain 42                 | NM_001099876 | 0.0217237   | 2.33276 |
| 17387 | XI2.4120.2.S1_at    | ---         | ---                                      | ---          | 0.00565958  | 2.32779 |
| 21224 | XI2.48950.1.S1_at   | nfil3       | nuclear factor, interleukin 3 regulated  | NM_001094210 | 0.000322454 | 2.31563 |
| 4805  | XI2.15389.1.A1_at   | ---         | ---                                      | ---          | 0.0112065   | 2.31067 |
| 20181 | XI2.47825.1.A1_at   | ---         | ---                                      | ---          | 0.0318565   | 2.30877 |
| 32398 | XI2.9893.1.A1_at    | ---         | ---                                      | ---          | 0.04554     | 2.30209 |
| 17824 | XI2.42594.1.S1_at   | ---         | ---                                      | ---          | 0.00609102  | 2.29373 |
| 32498 | XI2Affx.102.1.S1_at | wdr54       | D3Mm3e protein                           | NM_001096867 | 0.0244651   | 2.29143 |
| 27887 | XI2.56044.1.S1_at   | fsip1       | Fibrous sheath-interacting protein 1     | ---          | 0.00140921  | 2.29116 |
| 810   | XI2.10795.1.A1_at   | ---         | ---                                      | ---          | 0.0444514   | 2.2861  |
| 811   | XI2.10795.2.A1_at   | ---         | ---                                      | ---          | 0.01252     | 2.28489 |
| 14199 | XI2.3108.1.S1_at    | tm4sf18     | transmembrane 4 L six family member 18   | NM_001093304 | 0.036045    | 2.27364 |
| 8160  | XI2.19398.1.S1_at   | rilpl2      | Rab interacting lysosomal protein-like 2 | NM_001091627 | 0.00987861  | 2.27269 |
| 26106 | XI2.54099.1.S1_at   | ---         | ---                                      | ---          | 0.0105117   | 2.27113 |
| 4472  | XI2.1504.2.S1_at    | rsph3       | radial spoke 3 homolog                   | NM_001127814 | 0.0447759   | 2.27099 |
| 4662  | XI2.15231.1.S1_at   | ccdc104     | coiled-coil domain containing 104        | NM_001087370 | 0.000188626 | 2.26974 |
| 27122 | XI2.55294.1.A1_s_at | LOC414565   | Coiled-coil domain-containing protein 42 | ---          | 0.0450235   | 2.26897 |
| 21543 | XI2.49511.1.S1_at   | c6orf120    | chromosome 6 open reading frame 120      | NM_001171714 | 0.0298141   | 2.26466 |
| 14075 | XI2.30647.1.S1_at   | ikzf4       | IKAROS family zinc finger 4 (Eos)        | NM_001095169 | 0.00233767  | 2.26198 |
| 10675 | XI2.23698.1.S1_at   | ruvbl2      | RuvB-like 2                              | NM_001088596 | 0.00937095  | 2.24147 |
| 32376 | XI2.9867.1.A1_s_at  | ---         | ---                                      | ---          | 0.0331739   | 2.23736 |
| 7941  | XI2.19152.1.S1_at   | tchp        | trichoplein, keratin filament binding    | NM_001089051 | 0.0333082   | 2.23486 |
| 11103 | XI2.24163.1.S1_at   | MGC85335    | hcp beta-lactamase-like protein          | NM_001093824 | 0.0319638   | 2.23458 |
| 1972  | XI2.12333.1.A1_at   | ---         | ---                                      | ---          | 0.000102949 | 2.2337  |
| 11673 | XI2.24812.1.S1_at   | arl6        | ADP-ribosylation factor-like 6           | NM_001094062 | 0.0345209   | 2.22841 |
| 30567 | XI2.7579.1.S1_at    | wdr67       | WD repeat domain 67                      | NM_001093396 | 0.0113919   | 2.22783 |
| 17386 | XI2.4120.2.S1_a_at  | dnal4       | dynein, axonemal, light chain 4          | NM_001093995 | 0.00231503  | 2.22042 |
| 7620  | XI2.18703.1.A1_at   | MGC154843   | Hypothetical protein MGC154843           | NM_001096935 | 0.0391493   | 2.21187 |
| 1074  | XI2.1113.1.S1_at    | kif3b       | kinesin family member 3B                 | NM_001088020 | 0.0276089   | 2.20043 |
| 29717 | XI2.6590.1.S1_at    | LOC10003723 | hypothetical protein LOC100037235        | NM_001097912 | 0.00920296  | 2.19894 |

|       |                     |           |                                          |              |            |         |
|-------|---------------------|-----------|------------------------------------------|--------------|------------|---------|
| 6274  | XI2.17143.1.S1_at   | ---       | ---                                      | ---          | 0.0089113  | 2.18829 |
| 6377  | XI2.17266.2.A1_at   | ---       | ---                                      | ---          | 0.00841135 | 2.18265 |
| 8884  | XI2.2054.1.A1_at    | ---       | ---                                      | ---          | 0.0106908  | 2.16114 |
| 24527 | XI2.52635.1.S1_at   | ---       | ---                                      | ---          | 0.00854027 | 2.15795 |
| 30764 | XI2.7809.1.S2_at    | MGC81892  | MGC81892 protein                         | NM_001092597 | 0.0339836  | 2.15462 |
| 31418 | XI2.8721.1.S1_at    | rcbtb2    | RCC1 and BTB (POZ) domains               | NM_001086844 | 0.00931234 | 2.14114 |
| 11111 | XI2.24168.1.A1_at   | ---       | ---                                      | ---          | 0.0203624  | 2.12876 |
| 13702 | XI2.29662.1.S1_at   | ---       | ---                                      | ---          | 0.0329403  | 2.12831 |
| 19502 | XI2.47125.1.S1_at   | errfi1    | ERBB receptor feedback inhibitor 1       | NM_001091771 | 0.0294676  | 2.11269 |
| 25414 | XI2.53449.1.S1_at   | wdr34     | WD repeat domain 34                      | NM_001096232 | 0.0274141  | 2.10862 |
| 5621  | XI2.16223.1.A1_at   | ift57     | intraflagellar transport 57 homolog      | NM_001114796 | 0.0194608  | 2.10321 |
| 5975  | XI2.16582.1.S1_at   | ---       | ---                                      | ---          | 0.030678   | 2.09625 |
| 5436  | XI2.16013.1.A1_at   | ---       | ---                                      | ---          | 0.0145745  | 2.08741 |
| 28029 | XI2.56196.1.A1_at   | ---       | ---                                      | ---          | 0.0117468  | 2.08111 |
| 32375 | XI2.9867.1.A1_at    | ---       | ---                                      | ---          | 0.0488131  | 2.07855 |
| 6045  | XI2.16666.1.A1_at   | ---       | ---                                      | ---          | 0.0457041  | 2.07711 |
| 14036 | XI2.305.1.S1_at     | myb       | v-myb homolog                            | NM_001088299 | 0.0435306  | 2.07081 |
| 29658 | XI2.6525.1.S1_at    | ---       | ---                                      | ---          | 0.0158054  | 2.06949 |
| 1194  | XI2.11297.1.A1_at   | ---       | ---                                      | ---          | 0.017806   | 2.06285 |
| 15250 | XI2.33183.3.A1_s_at | ---       | ---                                      | ---          | 0.0155167  | 2.05867 |
| 25931 | XI2.53938.1.A1_at   | ---       | ---                                      | ---          | 0.030971   | 2.05002 |
| 32437 | XI2.9932.1.A1_at    | c11orf60  | chromosome 11 open reading frame 60      | NM_001096924 | 0.0173787  | 2.03775 |
| 7317  | XI2.18370.1.A1_at   | ---       | ---                                      | ---          | 0.0148488  | 2.03217 |
| 24165 | XI2.52274.1.S1_at   | ---       | ---                                      | ---          | 0.00172095 | 2.02964 |
| 3963  | XI2.14485.1.A1_at   | ---       | ---                                      | ---          | 0.00191374 | 2.02738 |
| 12280 | XI2.25699.1.S1_at   | galnt4    | gaint4                                   | NM_001091569 | 0.0354504  | 2.02559 |
| 24732 | XI2.52847.1.A1_at   | heatr2    | HEAT repeat containing 2                 | NM_001097038 | 0.0347046  | 2.02313 |
| 26838 | XI2.55004.1.A1_at   | ---       | ---                                      | ---          | 0.0244319  | 2.01727 |
| 24553 | XI2.52662.1.S1_at   | ---       | ---                                      | ---          | 0.0392931  | 2.01516 |
| 29634 | XI2.6491.1.S1_at    | ---       | ---                                      | ---          | 0.00472834 | 2.01233 |
| 3972  | XI2.14491.1.A1_at   | ---       | ---                                      | ---          | 0.00451896 | 2.0096  |
| 14271 | XI2.3143.2.S1_at    | ---       | ---                                      | ---          | 0.00175328 | 1.99707 |
| 19511 | XI2.47133.1.S1_at   | c14orf102 | chromosome 14 open reading frame 102     | NM_001091502 | 0.0401611  | 1.99699 |
| 9001  | XI2.2079.1.S1_at    | b3gnt7    | B3Pht7                                   | NM_001092198 | 0.0257549  | 1.99534 |
| 10267 | XI2.23066.1.S1_at   | meis3-b   | Meis homeobox 3                          | NM_001086063 | 0.0267127  | 1.99137 |
| 28752 | XI2.56882.1.S1_at   | ---       | ---                                      | ---          | 0.0262125  | 1.99005 |
| 11182 | XI2.24254.1.A1_at   | ---       | ---                                      | ---          | 0.0288217  | 1.98353 |
| 29744 | XI2.662.1.S2_x_at   | rbm24     | RNA binding motif protein 24             | NM_001087526 | 0.0265437  | 1.97066 |
| 13073 | XI2.2800.1.A1_at    | ---       | ---                                      | ---          | 0.0258051  | 1.95616 |
| 31677 | XI2.9041.1.A1_at    | ---       | ---                                      | ---          | 0.0128973  | 1.94691 |
| 20600 | XI2.48328.1.S1_at   | tuba4b    | tubulin, alpha 4b                        | NM_001094468 | 0.0368511  | 1.94411 |
| 22399 | XI2.50631.1.S1_at   | ---       | ---                                      | ---          | 0.0364518  | 1.93834 |
| 20144 | XI2.47781.1.A1_at   | ---       | ---                                      | ---          | 0.00292148 | 1.93813 |
| 19124 | XI2.46776.1.S1_at   | iqcb1     | IQ motif containing B1                   | NM_001091181 | 0.0213398  | 1.93214 |
| 30417 | XI2.7406.1.S1_at    | cep97     | centrosomal protein 97kDa                | NM_001092201 | 0.0314793  | 1.92438 |
| 18269 | XI2.4467.1.S1_at    | ---       | ---                                      | ---          | 0.0285431  | 1.92396 |
| 27949 | XI2.56109.1.S1_at   | ---       | ---                                      | ---          | 0.0349619  | 1.9182  |
| 8209  | XI2.19456.1.S1_at   | MGC82290  | hypothetical protein MGC82290            | NM_001091777 | 0.0265272  | 1.90076 |
| 664   | XI2.10624.1.S1_at   | ---       | ---                                      | ---          | 0.0365515  | 1.89508 |
| 3969  | XI2.14489.3.A1_at   | ---       | ---                                      | ---          | 0.0240822  | 1.8944  |
| 12098 | XI2.25454.1.S1_at   | ---       | ---                                      | ---          | 0.00622262 | 1.89214 |
| 10329 | XI2.23201.1.A1_x_at | ---       | ---                                      | ---          | 0.0139609  | 1.89201 |
| 9346  | XI2.2148.2.A1_a_at  | ---       | ---                                      | ---          | 0.0275141  | 1.88282 |
| 18391 | XI2.44987.2.A1_x_at | ---       | ---                                      | ---          | 0.00898882 | 1.86913 |
| 6550  | XI2.17481.1.S1_at   | mthfd2    | methylene tetrahydrofolate dehydrogenase | NM_001093337 | 0.0297963  | 1.86772 |

|       |                     |              |                                          |              |            |         |
|-------|---------------------|--------------|------------------------------------------|--------------|------------|---------|
| 1394  | XI2.11505.1.S1_at   | arl2         | ADP-ribosylation factor-like 2           | NM_001095515 | 0.0217797  | 1.85352 |
| 5340  | XI2.15912.1.A1_s_at | phospho2     | phosphatase, orphan 2                    | NM_001096935 | 0.0227095  | 1.85235 |
| 23414 | XI2.51583.2.A1_at   | ---          | ---                                      | ---          | 0.0497085  | 1.84881 |
| 19757 | XI2.47404.1.S1_at   | epas1        | endothelial PAS domain protein 1         | NM_001092249 | 0.0154864  | 1.84622 |
| 7741  | XI2.18887.1.A1_at   | ---          | ---                                      | ---          | 0.0388404  | 1.82875 |
| 8307  | XI2.19559.1.S1_at   | ccdc15       | coiled-coil domain containing 15         | NM_001096685 | 0.0409453  | 1.82843 |
| 19295 | XI2.46928.2.A1_x_at | ---          | ---                                      | ---          | 0.0170737  | 1.82368 |
| 3522  | XI2.13994.1.A1_at   | ---          | ---                                      | ---          | 0.0431144  | 1.82149 |
| 3362  | XI2.1383.1.A1_at    | ---          | ---                                      | ---          | 0.00263598 | 1.82146 |
| 29738 | XI2.6615.1.S1_at    | ddit4        | DNA-damage-inducible transcript 4        | NM_001086322 | 0.0235549  | 1.82062 |
| 1727  | XI2.1205.1.S1_a_at  | h1f0         | H1 histone family, member 0              | NM_001089228 | 0.00778518 | 1.80628 |
| 23052 | XI2.51209.1.A1_at   | ---          | ---                                      | ---          | 0.0306849  | 1.79328 |
| 7825  | XI2.18997.1.S1_at   | nek4         | NIMA -related kinase 4                   | NM_001091106 | 0.0107314  | 1.79317 |
| 4821  | XI2.15408.1.A1_at   | ---          | ---                                      | ---          | 0.0126523  | 1.79146 |
| 22461 | XI2.50686.1.S1_at   | ---          | ---                                      | ---          | 0.0013887  | 1.77904 |
| 26115 | XI2.54115.1.S1_at   | ---          | ---                                      | ---          | 0.0147367  | 1.77528 |
| 20769 | XI2.48479.1.S1_at   | c11orf65     | chromosome 11 open reading frame 65      | NM_001095354 | 0.0388083  | 1.77206 |
| 25191 | XI2.53251.1.S1_at   | ccdc138      | coiled-coil domain containing 138        | NM_001095943 | 0.00465655 | 1.76848 |
| 5205  | XI2.15781.1.S1_at   | tbc1d16      | TBC1 domain family, member 16            | NM_001086481 | 0.00565177 | 1.76003 |
| 918   | XI2.10911.1.A1_at   | LOC100037203 | hypothetical protein LOC100037203        | NM_001113429 | 0.040114   | 1.75175 |
| 4635  | XI2.15201.1.A1_at   | ---          | ---                                      | ---          | 0.0372432  | 1.75048 |
| 17871 | XI2.4275.1.S2_at    | nek2         | NIMA -related kinase 2                   | NM_001086021 | 0.0434318  | 1.74738 |
| 22418 | XI2.50648.1.A1_x_at | was          | Wiskott-Aldrich syndrome                 | NM_001097903 | 0.0276232  | 1.73722 |
| 8147  | XI2.19380.2.S1_at   | nsun7        | NOP2/Sun domain family, member 7         | NM_001127753 | 0.0441174  | 1.73293 |
| 7079  | XI2.18090.1.S1_at   | pcif1        | PDX1 C-terminal inhibiting factor 1      | NM_001095735 | 0.0264631  | 1.72267 |
| 2051  | XI2.1242.1.S1_at    | arg1         | arginase, liver                          | NM_001086948 | 0.00857889 | 1.72183 |
| 25433 | XI2.53466.1.S1_at   | ---          | ---                                      | ---          | 0.00523573 | 1.72174 |
| 31853 | XI2.925.1.S1_at     | pcm1         | pericentriolar material 1                | NM_001087900 | 0.0173649  | 1.71938 |
| 11458 | XI2.24570.1.A1_at   | ---          | ---                                      | ---          | 0.013027   | 1.71278 |
| 21928 | XI2.50157.1.S1_at   | ---          | ---                                      | ---          | 0.0214899  | 1.7127  |
| 9800  | XI2.21947.1.A1_x_at | mycn         | v-myc                                    | NM_001171989 | 0.0412758  | 1.7111  |
| 17875 | XI2.4276.1.S1_at    | LOC397885    | cyclin A1                                | NM_001088046 | 0.0174732  | 1.70957 |
| 3468  | XI2.13942.2.S1_at   | ---          | ---                                      | ---          | 0.0376487  | 1.70815 |
| 6379  | XI2.17269.1.A1_at   | ---          | ---                                      | ---          | 0.00971978 | 1.70356 |
| 29064 | XI2.5764.1.S2_at    | slc7a7       | solute carrier family 7                  | NM_001091766 | 0.0177278  | 1.69979 |
| 28389 | XI2.56540.1.S1_at   | atp2c2       | ATPase, Ca <sup>++</sup> transporting    | NM_001096502 | 0.0409726  | 1.6832  |
| 15864 | XI2.34138.1.A1_at   | ---          | ---                                      | ---          | 0.00708136 | 1.68083 |
| 5341  | XI2.15912.2.S1_s_at | phospho2     | phosphatase, orphan 2                    | NM_001096935 | 0.0407664  | 1.67682 |
| 18725 | XI2.45827.1.S1_at   | ---          | ---                                      | ---          | 0.0159166  | 1.66866 |
| 18319 | XI2.4480.1.S1_at    | dcp1b        | DCP1 decapping enzyme homolog B          | NM_001093497 | 0.0177252  | 1.66322 |
| 32123 | XI2.9562.1.S1_at    | ppp2r3c      | protein phosphatase 2 (formerly 2A)      | NM_001089820 | 0.0062348  | 1.66201 |
| 16059 | XI2.34505.1.S1_at   | fut3         | fucosyltransferase 3                     | NM_001090197 | 0.0235245  | 1.65891 |
| 32317 | XI2.9793.1.A1_at    | ---          | ---                                      | ---          | 0.00316687 | 1.65568 |
| 16087 | XI2.34567.1.A1_a_at | ---          | ---                                      | ---          | 0.0124017  | 1.65381 |
| 5628  | XI2.16229.1.S1_at   | LOC494771    | Hypothetical LOC494771                   | ---          | 0.0269948  | 1.6509  |
| 5673  | XI2.16274.1.S1_at   | gpatch3      | G patch domain containing 3              | NM_001093138 | 0.0240904  | 1.63978 |
| 16208 | XI2.3473.1.S1_at    | ---          | ---                                      | ---          | 0.0142967  | 1.63357 |
| 6647  | XI2.17591.2.A1_at   | arl16        | ADP-ribosylation factor-like 16          | ---          | 0.0392404  | 1.62952 |
| 3364  | XI2.13831.1.S1_at   | ---          | ---                                      | ---          | 0.0339391  | 1.62773 |
| 11045 | XI2.24108.1.A1_at   | ---          | ---                                      | ---          | 0.00287481 | 1.62688 |
| 31790 | XI2.9175.1.S1_at    | ---          | ---                                      | ---          | 0.0423111  | 1.62518 |
| 20851 | XI2.48549.1.S1_at   | ---          | ---                                      | ---          | 0.0118618  | 1.61644 |
| 9113  | XI2.21133.1.S1_at   | ugcg         | UDP-glucose ceramide glucosyltransferase | NM_001095097 | 0.0100388  | 1.61558 |
| 12036 | XI2.25380.1.S1_at   | ---          | ---                                      | ---          | 0.00337591 | 1.61547 |



|       |                     |           |                                           |              |             |         |
|-------|---------------------|-----------|-------------------------------------------|--------------|-------------|---------|
| 7369  | XI2.18427.1.A1_at   | ---       | ---                                       | ---          | 0.0402823   | 1.6121  |
| 22544 | XI2.50793.1.S1_at   | ---       | ---                                       | ---          | 0.0169277   | 1.60747 |
| 6412  | XI2.17300.1.A1_at   | ---       | ---                                       | ---          | 0.0482853   | 1.60007 |
| 21979 | XI2.50219.1.S1_at   | zfand2b   | zinc finger, AN1-type domain 2B           | NM_001095372 | 0.047597    | 1.59731 |
| 12759 | XI2.26415.1.S1_at   | tepp      | testis, prostate and placenta expressed   | NM_001172203 | 0.0354614   | 1.5949  |
| 25258 | XI2.5330.2.S1_at    | ---       | ---                                       | ---          | 0.0379947   | 1.59298 |
| 23454 | XI2.51615.1.S1_a_at | ---       | ---                                       | ---          | 0.0178873   | 1.59134 |
| 26846 | XI2.55012.1.A1_at   | ---       | ---                                       | ---          | 0.0325429   | 1.59117 |
| 7088  | XI2.18107.1.A1_at   | ---       | ---                                       | ---          | 0.0175705   | 1.58121 |
| 3112  | XI2.13570.1.S1_at   | ---       | ---                                       | ---          | 0.00422703  | 1.57819 |
| 28751 | XI2.56882.1.S1_a_at | ---       | ---                                       | ---          | 0.00746597  | 1.5738  |
| 1512  | XI2.11681.1.S1_at   | elrA      | Ribonucleoprotein                         | NM_001090609 | 0.0205581   | 1.57217 |
| 12662 | XI2.2630.1.S1_at    | tmem110.2 | transmembrane protein 110                 | NM_001094770 | 0.00447563  | 1.57052 |
| 3504  | XI2.13979.1.A1_at   | ---       | ---                                       | ---          | 0.0330068   | 1.56415 |
| 30145 | XI2.7087.1.S1_at    | aida-a    | axin interactor, dorsalization associated | NM_001089723 | 0.0218335   | 1.55971 |
| 25764 | XI2.53796.1.S2_at   | cldn4     | claudin 4                                 | NM_001096114 | 0.0460746   | 1.5591  |
| 5622  | XI2.16223.2.S1_at   | ift57     | intraflagellar transport 57 homolog       | NM_001114796 | 0.00952381  | 1.55499 |
| 23971 | XI2.52119.1.S1_a_at | ---       | ---                                       | ---          | 0.00350505  | 1.54619 |
| 1063  | XI2.11115.1.S1_at   | MGC68847  | hypothetical protein MGC68847             | NM_001086472 | 0.0311481   | 1.54224 |
| 7061  | XI2.18065.1.S1_at   | ---       | ---                                       | ---          | 0.0113684   | 1.5326  |
| 9221  | XI2.21337.1.S1_at   | ---       | ---                                       | ---          | 0.036548    | 1.52975 |
| 4449  | XI2.15013.1.A1_at   | ---       | ---                                       | ---          | 0.00267869  | 1.52845 |
| 24022 | XI2.52154.1.A1_at   | ---       | ---                                       | ---          | 0.0495246   | 1.5273  |
| 22844 | XI2.51044.2.S1_s_at | ---       | ---                                       | ---          | 0.0383234   | 1.51891 |
| 27234 | XI2.55425.1.S1_at   | MGC131023 | hypothetical protein MGC131023            | NM_001096390 | 0.000994242 | 1.51833 |
| 32332 | XI2.9817.1.A1_at    | ---       | ---                                       | ---          | 0.00338675  | 1.51399 |
| 25840 | XI2.5387.1.A1_at    | ---       | ---                                       | ---          | 0.0081053   | 1.51006 |
| 14644 | XI2.32266.1.A1_at   | ---       | ---                                       | ---          | 0.035937    | 1.50832 |
| 5844  | XI2.16443.1.A1_at   | ---       | ---                                       | ---          | 6.95E-05    | 1.49994 |
| 26549 | XI2.54741.1.A1_at   | ---       | ---                                       | ---          | 0.0126945   | 1.49645 |
| 12683 | XI2.26329.1.S1_at   | fam98a    | family with sequence similarity 98A       | NM_001093909 | 0.0187014   | 1.4934  |
| 24378 | XI2.52489.1.S1_at   | ---       | ---                                       | ---          | 0.00272243  | 1.49274 |
| 16844 | XI2.3804.1.S1_at    | rab25     | RAB25, member RAS oncogene family         | NM_001092754 | 0.0304989   | 1.48845 |
| 3411  | XI2.13889.1.A1_at   | ---       | ---                                       | ---          | 0.0133434   | 1.48365 |
| 6292  | XI2.17162.1.S1_at   | nbr1      | neighbor of BRCA1 gene 1                  | NM_001086498 | 0.0402227   | 1.48075 |
| 19197 | XI2.46835.1.A1_at   | ---       | ---                                       | ---          | 0.0169528   | 1.48044 |
| 500   | XI2.10421.1.A1_at   | ---       | ---                                       | ---          | 0.00842378  | 1.47988 |
| 21987 | XI2.50228.1.S1_at   | LOC733401 | Hypothetical protein LOC733401            | ---          | 0.0158585   | 1.47945 |
| 4939  | XI2.15526.1.S1_at   | MGC131013 | hypothetical protein MGC131013            | NM_001096386 | 0.0457184   | 1.47814 |
| 24919 | XI2.53011.1.S1_at   | ---       | ---                                       | ---          | 0.000316716 | 1.4764  |
| 14192 | XI2.31053.1.A1_at   | ---       | ---                                       | ---          | 0.0184217   | 1.47255 |
| 30033 | XI2.6970.1.S1_at    | ndufa8    | NADH dehydrogenase (ubiquinone)           | NM_001096329 | 0.0143902   | 1.47058 |
| 2229  | XI2.12619.1.A1_at   | ---       | ---                                       | ---          | 0.0403782   | 1.46317 |
| 16580 | XI2.3583.1.A1_at    | ---       | ---                                       | ---          | 0.0457662   | 1.46256 |
| 21056 | XI2.48756.1.S1_at   | parp11    | poly (ADP-ribose) polymerase family       | NM_001095214 | 0.000349853 | 1.46207 |
| 4278  | XI2.14815.1.S1_a_at | ptpn4     | protein tyrosine phosphatase              | NM_001091402 | 0.0378902   | 1.45756 |
| 23535 | XI2.517.1.S1_at     | rnd1      | Rho family GTPase 1                       | NM_001086916 | 0.0147073   | 1.4552  |
| 27147 | XI2.55325.1.A1_at   | ---       | ---                                       | ---          | 0.0394861   | 1.45049 |
| 18566 | XI2.45447.1.S1_at   | cab39l    | calcium binding protein 39-like           | NM_001089927 | 0.0229577   | 1.45041 |
| 31622 | XI2.8984.1.A1_at    | ---       | ---                                       | ---          | 0.0336592   | 1.44805 |
| 13968 | XI2.30259.1.S1_at   | ccng2     | cyclin G2                                 | NM_001091414 | 0.0214231   | 1.44637 |
| 2738  | XI2.13148.1.S1_x_at | hmgcs1    | hmgcs1                                    | NM_001086930 | 0.00976006  | 1.43756 |
| 6068  | XI2.16687.1.S1_at   | ---       | ---                                       | ---          | 0.0441968   | 1.43747 |
| 9185  | XI2.21276.1.S1_at   | ---       | ---                                       | ---          | 0.0116984   | 1.43607 |
| 4816  | XI2.15405.1.S1_at   | c2orf7    | chromosome 2 open reading frame 7         | ---          | 0.0261782   | 1.43474 |

|       |                     |           |                                              |              |             |         |
|-------|---------------------|-----------|----------------------------------------------|--------------|-------------|---------|
| 11252 | XI2.24341.1.S1_at   | ---       | ---                                          | ---          | 0.0342072   | 1.43362 |
| 8657  | XI2.1998.1.S1_at    | ebi3      | Epstein-Barr virus induced 3                 | ---          | 0.00246739  | 1.43201 |
| 26495 | XI2.54541.1.S1_at   | ---       | ---                                          | ---          | 0.0432921   | 1.42582 |
| 8489  | XI2.19794.1.S1_at   | rab37     | RAB37, member RAS oncogene family            | ---          | 0.0127193   | 1.4256  |
| 28896 | XI2.57009.2.S1_at   | ---       | ---                                          | ---          | 0.00859164  | 1.42128 |
| 20608 | XI2.48334.1.S1_at   | pibf1     | progesterone binding factor 1                | NM_001093473 | 0.0378279   | 1.41931 |
| 12411 | XI2.25898.1.S1_at   | sdccag3   | serologically defined colon cancer antigen 3 | ---          | 0.00433402  | 1.41424 |
| 28489 | XI2.56626.1.S1_at   | ndufab1   | NADH dehydrogenase (ubiquinone)              | NM_001096333 | 0.0342459   | 1.41228 |
| 24348 | XI2.52459.1.S1_at   | ---       | ---                                          | ---          | 0.0264144   | 1.41128 |
| 13460 | XI2.29269.1.S1_at   | MGC81138  | hypothetical protein MGC81138                | NM_001091403 | 0.0118032   | 1.41031 |
| 21449 | XI2.4918.1.A1_at    | ---       | ---                                          | ---          | 0.0245228   | 1.40707 |
| 22120 | XI2.50372.1.S1_at   | MGC84453  | MGC84453 protein                             | NM_001094299 | 0.017179    | 1.40535 |
| 2777  | XI2.13193.1.S1_at   | ---       | ---                                          | ---          | 0.0102991   | 1.40414 |
| 32107 | XI2.9547.1.S1_at    | tmem106c  | transmembrane protein 106C                   | NM_001086160 | 0.0338772   | 1.40168 |
| 454   | XI2.10367.2.S1_a_at | txndc9    | thioredoxin domain containing 9              | NM_001087441 | 0.0268988   | 1.39978 |
| 21931 | XI2.5016.1.A1_at    | ---       | ---                                          | ---          | 0.00543603  | 1.39812 |
| 16115 | XI2.34606.1.S1_at   | tuba8     | tubulin, alpha 8                             | NM_001096986 | 0.0165895   | 1.3974  |
| 19942 | XI2.47576.1.S1_at   | fbxo8     | F-box protein 8                              | NM_001092821 | 0.0311321   | 1.39414 |
| 12358 | XI2.25809.1.S1_at   | frs1      | ferric-chelate reductase 1                   | NM_001091659 | 0.000364582 | 1.39146 |
| 10058 | XI2.22525.1.S1_at   | ---       | ---                                          | ---          | 0.0418729   | 1.38841 |
| 21642 | XI2.49701.1.S1_s_at | LOC733253 | Hypothetical protein LOC733253               | ---          | 0.0435899   | 1.37984 |
| 15957 | XI2.34369.1.S1_at   | LOC432287 | hypothetical protein LOC432287               | ---          | 0.0111182   | 1.37778 |
| 4072  | XI2.14597.2.A1_at   | ---       | ---                                          | ---          | 0.0119299   | 1.37722 |
| 5160  | XI2.1573.1.S1_at    | sfrs3     | splicing factor, arginine serine-rich 3      | NM_001086991 | 0.0201116   | 1.37203 |
| 30707 | XI2.7735.1.A1_at    | ---       | ---                                          | ---          | 0.0147425   | 1.37147 |
| 4136  | XI2.14658.2.S1_at   | ---       | ---                                          | ---          | 0.038711    | 1.36729 |
| 5039  | XI2.15619.1.S1_at   | MGC81201  | hypothetical protein MGC81201                | NM_001091115 | 0.0284168   | 1.36587 |
| 7795  | XI2.18948.1.A1_at   | ---       | ---                                          | ---          | 0.0174907   | 1.36467 |
| 2913  | XI2.13357.1.A1_at   | ---       | ---                                          | ---          | 0.0155035   | 1.36409 |
| 9242  | XI2.21384.1.S1_at   | cat1      | calcium transporter 1                        | NM_001088867 | 0.0177117   | 1.36341 |
| 6380  | XI2.17269.2.S1_at   | ---       | ---                                          | ---          | 0.0457899   | 1.35072 |
| 20858 | XI2.48555.1.A1_at   | ---       | ---                                          | ---          | 0.0337596   | 1.34879 |
| 24992 | XI2.53075.1.S1_at   | ---       | ---                                          | ---          | 0.0139442   | 1.34822 |
| 29593 | XI2.6440.1.S1_at    | phc2      | polyhomeotic homolog 2                       | NM_001096010 | 0.0377609   | 1.34686 |
| 29806 | XI2.6698.1.S1_at    | ---       | ---                                          | ---          | 0.0415166   | 1.34347 |
| 7392  | XI2.18450.1.S1_at   | wdr37     | WD repeat domain 37                          | NM_001093426 | 0.0229857   | 1.34183 |
| 16450 | XI2.3518.1.A1_at    | ---       | ---                                          | ---          | 0.0109055   | 1.33463 |
| 8759  | XI2.20118.1.S1_at   | ---       | ---                                          | ---          | 0.0282849   | 1.33387 |
| 7520  | XI2.18607.1.S1_at   | tbpl2     | TATA box binding protein like 2              | NM_001087452 | 0.0310028   | 1.33118 |
| 14089 | XI2.3069.1.A1_at    | ---       | ---                                          | ---          | 0.041939    | 1.33074 |
| 7514  | XI2.1860.1.A1_at    | ---       | ---                                          | ---          | 0.0263271   | 1.33007 |
| 6088  | XI2.16708.2.S1_at   | ---       | ---                                          | ---          | 0.0444879   | 1.32757 |
| 9169  | XI2.2125.1.S1_at    | dbia      | diazepam binding inhibitor (dbi) a           | NM_001092478 | 0.0129649   | 1.32687 |
| 12691 | XI2.26342.1.S1_at   | gsr       | glutathione reductase                        | NM_001095853 | 0.0166614   | 1.32639 |
| 28760 | XI2.56890.1.S1_at   | ---       | ---                                          | ---          | 0.00386361  | 1.32559 |
| 7845  | XI2.19015.1.A1_at   | ---       | ---                                          | ---          | 0.00132632  | 1.32363 |
| 16457 | XI2.35201.1.S1_at   | ---       | ---                                          | ---          | 0.0436287   | 1.32251 |
| 3946  | XI2.14454.1.A1_at   | ---       | ---                                          | ---          | 0.0145266   | 1.32054 |
| 16639 | XI2.36445.1.S1_at   | ---       | ---                                          | ---          | 0.00704493  | 1.31368 |
| 962   | XI2.10958.1.A1_at   | ---       | ---                                          | ---          | 0.0404025   | 1.31212 |
| 5119  | XI2.15698.1.A1_at   | ---       | ---                                          | ---          | 0.0434316   | 1.31122 |
| 17475 | XI2.4144.1.A1_at    | ---       | ---                                          | ---          | 0.00122851  | 1.31102 |
| 18273 | XI2.44683.2.S1_at   | ---       | ---                                          | ---          | 0.0477823   | 1.30812 |
| 14740 | XI2.32386.1.A1_at   | ---       | ---                                          | ---          | 0.0291253   | 1.30793 |

|       |                     |                      |                                             |                                  |            |         |
|-------|---------------------|----------------------|---------------------------------------------|----------------------------------|------------|---------|
| 21896 | XI2.50126.1.S1_at   | LOC495967            | hypothetical LOC495967                      | NM_001095234                     | 0.0401229  | 1.30362 |
| 29927 | XI2.6850.1.A1_at    | ---                  | ---                                         | ---                              | 0.011087   | 1.30059 |
| 32160 | XI2.9617.1.A1_at    | ---                  | ---                                         | ---                              | 0.00886959 | 1.30018 |
| 14541 | XI2.32146.1.S1_at   | MGC81773             | MGC81773 protein                            | NM_001093298                     | 0.0367713  | 1.29752 |
| 16706 | XI2.37003.1.S1_at   | necap1               | NECAP endocytosis associated 1              | NM_001092025                     | 0.0270955  | 1.29698 |
| 6140  | XI2.16777.1.A1_a_at | ---                  | ---                                         | ---                              | 0.0132112  | 1.29661 |
| 21312 | XI2.49031.1.S1_at   | nsdhl                | NAD(P) dependent steroid dehydrogenase      | NM_001095421                     | 0.0127558  | 1.29451 |
| 29688 | XI2.6557.1.S1_at    | atp1b1               | ATPase, Na+/K+ transporting                 | NM_001086759                     | 0.0453075  | 1.29407 |
| 28250 | XI2.56409.2.A1_at   | ---                  | ---                                         | ---                              | 0.0188269  | 1.2933  |
| 27574 | XI2.55749.1.A1_at   | ---                  | ---                                         | ---                              | 0.016579   | 1.29129 |
| 2664  | XI2.13063.1.S1_at   | anks3                | ankyrin repeat and sterile alpha motif      | NM_001091170                     | 0.0303508  | 1.29043 |
| 25883 | XI2.53904.1.A1_s_at | LOC733261            | hypothetical protein LOC733261              | NM_001099861                     | 0.0496631  | 1.29015 |
| 18188 | XI2.44203.1.S1_a_at | luc7l3               | LUC7-like 3                                 | NM_001096916                     | 0.0482926  | 1.28914 |
| 9347  | XI2.2148.3.S1_at    | ---                  | ---                                         | ---                              | 0.0168607  | 1.28599 |
| 5377  | XI2.15954.1.S1_at   | ---                  | ---                                         | ---                              | 0.0407988  | 1.28535 |
| 1181  | XI2.11282.2.S1_at   | ---                  | ---                                         | ---                              | 0.0456687  | 1.28468 |
| 13102 | XI2.2824.1.S1_at    | ---                  | ---                                         | ---                              | 0.00521253 | 1.28434 |
| 31889 | XI2.9285.1.A1_at    | ---                  | ---                                         | ---                              | 0.0486068  | 1.28371 |
| 792   | XI2.10784.1.A1_at   | ---                  | ---                                         | ---                              | 0.00978073 | 1.28307 |
| 20671 | XI2.48395.1.S1_at   | cdkn2d               | p19, inhibits CDK4                          | NM_001093415                     | 0.0406928  | 1.28166 |
| 18501 | XI2.45292.1.S1_at   | cisd1a               | CDGSH iron sulfur domain 1 a                | NM_001094218                     | 0.0154703  | 1.27731 |
| 25956 | XI2.53955.1.S1_at   | MGC116491            | hypothetical protein MGC116491              | NM_001096155                     | 0.00396558 | 1.27492 |
| 19553 | XI2.47170.1.S1_at   | slc7a4               | solute carrier family 7                     | NM_001091323                     | 0.03185    | 1.2733  |
| 225   | XI2.10068.2.S1_at   | ---                  | ---                                         | ---                              | 0.0342503  | 1.27154 |
| 7737  | XI2.18883.1.A1_at   | ---                  | ---                                         | ---                              | 0.0119723  | 1.27104 |
| 11171 | XI2.24238.1.A1_at   | ---                  | ---                                         | ---                              | 0.0435839  | 1.27001 |
| 4178  | XI2.14709.1.A1_at   | LOC100037124         | hypothetical protein LOC100037124           | ---                              | 0.016482   | 1.2687  |
| 18089 | XI2.4351.1.S1_at    | LOC733432            | hypothetical protein LOC733432              | ---                              | 0.0302682  | 1.26524 |
| 8825  | XI2.2037.1.S1_at    | ---                  | ---                                         | ---                              | 0.0076415  | 1.2635  |
| 20484 | XI2.48214.1.S1_at   | pxk                  | PX domain containing kinase                 | NM_001096762                     | 0.0396156  | 1.25767 |
| 18938 | XI2.46429.2.S1_at   | ---                  | ---                                         | ---                              | 0.0284683  | 1.25546 |
| 21196 | XI2.48890.1.S1_at   | rpe65                | retinal pigment epithelium-specific protein | NM_001094320                     | 0.0211928  | 1.25397 |
| 24039 | XI2.52168.3.A1_at   | ---                  | ---                                         | ---                              | 0.0294352  | 1.25335 |
| 3348  | XI2.13807.1.A1_at   | ---                  | ---                                         | ---                              | 0.0200973  | 1.25314 |
| 30932 | XI2.801.1.A1_at     | goosecoid            | goosecoid protein                           | ---                              | 0.00665542 | 1.25017 |
| 10417 | XI2.23386.1.S1_at   | ---                  | ---                                         | ---                              | 0.00778662 | 1.24919 |
| 4907  | XI2.15490.3.A1_at   | ---                  | ---                                         | ---                              | 0.0436468  | 1.24896 |
| 17147 | XI2.4028.1.S1_at    | ---                  | ---                                         | ---                              | 0.0384269  | 1.24674 |
| 15478 | XI2.33675.1.S1_at   | rabepk               | Rab9 effector protein with kelch motifs     | NM_001093901                     | 0.0154992  | 1.24288 |
| 29127 | XI2.5866.1.S1_at    | edf1                 | endothelial differentiation-related factor  | NM_001092165                     | 0.026594   | 1.24284 |
| 32079 | XI2.9514.1.S1_at    | ---                  | ---                                         | ---                              | 0.00177958 | 1.24257 |
| 3350  | XI2.1381.1.A1_at    | ---                  | ---                                         | ---                              | 0.00190368 | 1.24256 |
| 31436 | XI2.876.1.S1_at     | lyn                  | v-yes-1                                     | NM_001085646                     | 0.0384166  | 1.2402  |
| 13512 | XI2.29353.2.S1_at   | ---                  | ---                                         | ---                              | 0.0411088  | 1.24017 |
| 17694 | XI2.42186.1.S1_at   | ---                  | ---                                         | ---                              | 0.0281397  | 1.23945 |
| 32016 | XI2.9424.1.A1_at    | ---                  | ---                                         | ---                              | 0.0426276  | 1.23943 |
| 1689  | XI2.12006.1.A1_at   | XSu(H)1              | Suppressor of hairless protein 1            | NM_001090878                     | 0.0218998  | 1.23838 |
| 32548 | XI2Affx.145.1.S1_at | MGC154801            | hypothetical protein MGC154801              | NM_001096926                     | 0.0100067  | 1.23783 |
| 31348 | XI2.8594.1.S1_s_at  | MGC78985 ///<br>ncs1 | neuronal calcium sensor 1                   | NM_001090619 ///<br>NM_001091667 | 0.0291083  | 1.23736 |
| 23918 | XI2.52075.1.A1_at   | ---                  | ---                                         | ---                              | 0.0289582  | 1.23731 |
| 21797 | XI2.49929.1.S1_at   | atf6                 | activating transcription factor 6           | NM_001095322                     | 0.00465506 | 1.23634 |
| 30078 | XI2.7020.1.S1_at    | plk4                 | polo-like kinase 4                          | NM_001089677                     | 0.0414889  | 1.2354  |
| 30865 | XI2.7919.1.S1_at    | MGC81684             | MGC81684 protein                            | NM_001094170                     | 0.0375208  | 1.2345  |
| 30772 | XI2.7817.1.S2_at    | xcen                 | centrin                                     | NM_001087929                     | 0.0110742  | 1.23392 |

|       |                     |              |                                              |              |             |          |
|-------|---------------------|--------------|----------------------------------------------|--------------|-------------|----------|
| 32428 | XI2.9924.1.A1_at    | ---          | ---                                          | ---          | 0.00535755  | 1.23205  |
| 12833 | XI2.26519.1.A1_at   | LOC398637    | hypothetical protein LOC398637               | ---          | 0.0435407   | 1.23137  |
| 27903 | XI2.56061.1.A1_at   | ---          | ---                                          | ---          | 0.0491744   | 1.22939  |
| 6945  | XI2.17932.1.A1_at   | ---          | ---                                          | ---          | 0.0137395   | 1.22718  |
| 8396  | XI2.19661.1.A1_at   | ---          | ---                                          | ---          | 0.027       | 1.22446  |
| 24086 | XI2.52203.1.S1_at   | edf1         | endothelial differentiation-related factor 1 | NM_001096291 | 0.045238    | 1.22422  |
| 9606  | XI2.21651.1.S1_at   | dnah9        | dynein, axonemal, heavy chain 9              | ---          | 0.0127011   | 1.22111  |
| 6730  | XI2.17688.1.A1_at   | ---          | ---                                          | ---          | 0.00243883  | 1.22069  |
| 15629 | XI2.3386.1.S1_at    | galnt6       | Gaint6                                       | NM_001174036 | 0.0429413   | 1.22065  |
| 29317 | XI2.6101.1.A1_at    | ap1b1        | adaptor-related protein complex 1            | NM_001097136 | 0.0496939   | 1.21829  |
| 19358 | XI2.46989.1.S1_x_at | polr2f       | Polymerase (RNA) II                          | NM_001095163 | 0.0202455   | 1.2163   |
| 25913 | XI2.53925.1.S1_at   | rbp2         | retinol binding protein 2, cellular          | ---          | 0.00133284  | 1.21625  |
| 7036  | XI2.18039.2.A1_at   | LOC100126628 | Hypothetical protein LOC100126628            | NM_001110735 | 0.0470168   | 1.21484  |
| 8947  | XI2.20638.1.A1_at   | ---          | ---                                          | ---          | 0.0498908   | 1.21328  |
| 12477 | XI2.26001.1.S1_at   | cpb1         | carboxypeptidase B1 (tissue)                 | NM_001095031 | 0.034082    | 1.21304  |
| 6410  | XI2.173.1.S1_at     | nefm         | neurofilament, medium polypeptide            | NM_001088210 | 0.00307187  | 1.20828  |
| 4159  | XI2.14686.1.S1_at   | ---          | ---                                          | ---          | 0.0295391   | 1.20739  |
| 10258 | XI2.23035.3.A1_x_at | ---          | ---                                          | ---          | 0.0430491   | 1.20725  |
| 32055 | XI2.9483.1.A1_at    | ---          | ---                                          | ---          | 0.00926604  | 1.2069   |
| 32425 | XI2.9922.2.A1_at    | ---          | ---                                          | ---          | 0.00418007  | 1.20606  |
| 22818 | XI2.51021.2.S1_a_at | ---          | ---                                          | ---          | 0.00867573  | -1.50125 |
| 1919  | XI2.12267.1.S1_at   | sh3bp4       | SH3-domain binding protein 4                 | NM_001091211 | 0.0375002   | -1.50246 |
| 31971 | XI2.9367.1.A1_at    | ---          | ---                                          | ---          | 0.000436022 | -1.50695 |
| 25644 | XI2.53675.1.S1_at   | ---          | ---                                          | ---          | 0.0368767   | -1.50751 |
| 29476 | XI2.6315.2.S1_at    | c1orf124     | chromosome 1 open reading frame 124          | ---          | 0.0208963   | -1.50794 |
| 708   | XI2.10681.1.A1_at   | ---          | ---                                          | ---          | 0.0109568   | -1.50827 |
| 27152 | XI2.55330.1.S1_at   | ---          | ---                                          | ---          | 0.0334487   | -1.50921 |
| 22299 | XI2.50544.1.S1_at   | ---          | ---                                          | ---          | 0.0205217   | -1.5168  |
| 5746  | XI2.16344.3.S1_a_at | ---          | ---                                          | ---          | 0.0304854   | -1.51979 |
| 22231 | XI2.50484.1.A1_at   | ---          | ---                                          | ---          | 0.0464604   | -1.52187 |
| 16516 | XI2.35366.2.S1_at   | ---          | ---                                          | ---          | 0.0133418   | -1.52226 |
| 11386 | XI2.24487.1.S1_at   | a2ld1        | ALG2-like domain 1                           | NM_001093833 | 0.0112459   | -1.52841 |
| 24474 | XI2.52580.1.S1_at   | ---          | ---                                          | ---          | 0.0166239   | -1.52868 |
| 27608 | XI2.55778.1.S1_at   | ---          | ---                                          | ---          | 0.0414589   | -1.53771 |
| 25916 | XI2.53928.1.S1_at   | MGC116527    | hypothetical protein MGC116527               | NM_001096165 | 0.0360195   | -1.5415  |
| 20100 | XI2.47734.2.S1_at   | ---          | ---                                          | ---          | 0.00910342  | -1.54214 |
| 20361 | XI2.48044.2.S1_at   | ---          | ---                                          | ---          | 0.002331    | -1.54331 |
| 17844 | XI2.42644.1.S1_at   | ---          | ---                                          | ---          | 0.0224784   | -1.54358 |
| 23436 | XI2.51600.1.S1_at   | ---          | ---                                          | ---          | 0.0207494   | -1.55088 |
| 29794 | XI2.6681.1.S1_at    | limd2        | LIM domain containing 2                      | NM_001092306 | 0.0151645   | -1.55538 |
| 2694  | XI2.13093.2.A1_at   | ---          | ---                                          | ---          | 0.0469415   | -1.5602  |
| 24851 | XI2.52945.1.S1_at   | ---          | ---                                          | ---          | 0.0052777   | -1.56977 |
| 13300 | XI2.28980.2.S1_at   | ---          | ---                                          | ---          | 0.0306863   | -1.5712  |
| 10131 | XI2.22706.2.S1_at   | ---          | ---                                          | ---          | 0.0469541   | -1.57335 |
| 25781 | XI2.53808.1.A1_a_at | ---          | ---                                          | ---          | 0.032757    | -1.57592 |
| 5931  | XI2.16538.1.S1_at   | sdca4-b      | syndecan-4.2                                 | NM_001095708 | 0.0165505   | -1.57716 |
| 14225 | XI2.31166.1.S1_s_at | zmym2        | zinc finger, MYM-type 2                      | NM_001093084 | 0.0201738   | -1.5789  |
| 18866 | XI2.46208.1.S1_at   | MGC81667     | MGC81667 protein                             | NM_001094380 | 0.0179483   | -1.59322 |
| 10875 | XI2.23934.1.S1_at   | gins1        | GINS complex subunit 1 (Psf1 homolog)        | NM_001092033 | 0.0115396   | -1.59632 |
| 4496  | XI2.15066.2.S1_at   | ---          | ---                                          | ---          | 0.0262745   | -1.59637 |
| 30173 | XI2.712.1.S1_at     | mcm10        | MCM 10                                       | NM_001088578 | 0.00264608  | -1.60001 |
| 30200 | XI2.7149.1.S1_at    | mcm6.2       | MCM 6                                        | NM_001137567 | 0.0121643   | -1.60182 |

|       |                     |                           |                                          |                                  |             |          |
|-------|---------------------|---------------------------|------------------------------------------|----------------------------------|-------------|----------|
| 12106 | XI2.2547.2.S1_a_at  | dhcr7                     | 7-dehydrocholesterol reductase           | NM_001086117                     | 0.0316756   | -1.6026  |
| 17518 | XI2.416.1.S1_at     | foxd1                     | forkhead box G1                          | NM_001085696                     | 0.00654142  | -1.61262 |
| 14059 | XI2.30590.1.S1_a_at | ---                       | ---                                      | ---                              | 0.0223421   | -1.61931 |
| 27760 | XI2.55926.1.S1_at   | brd3                      | bromodomain containing 3                 | NM_001097126                     | 0.0459135   | -1.62783 |
| 1075  | XI2.11130.1.S1_at   | ---                       | ---                                      | ---                              | 0.0184182   | -1.63502 |
| 15178 | XI2.33054.1.S1_at   | znf367                    | zinc finger protein 367                  | NM_001091893                     | 0.0266614   | -1.64549 |
| 22213 | XI2.50465.1.S1_s_at | vrk3                      | vaccinia related kinase 3                | NM_001092778                     | 0.0162923   | -1.65683 |
| 284   | XI2.1014.1.S1_at    | mcm4-b                    | MCM 4                                    | NM_001087979                     | 0.0303446   | -1.65723 |
| 31276 | XI2.846.1.S1_at     | ppard                     | PPAR delta                               | NM_001087841                     | 0.0188613   | -1.66801 |
| 7948  | XI2.19158.2.S1_at   | ---                       | ---                                      | ---                              | 0.00102407  | -1.67925 |
| 5925  | XI2.16521.2.S1_at   | ---                       | ---                                      | ---                              | 0.040037    | -1.67985 |
| 5126  | XI2.15703.2.A1_a_at | glipr2                    | GLI pathogenesis-related 2               | NM_001095072                     | 0.0374829   | -1.68464 |
| 27441 | XI2.55622.1.S1_s_at | ---                       | ---                                      | ---                              | 0.0471837   | -1.68469 |
| 26575 | XI2.54761.1.A1_s_at | c9orf167 ///<br>MGC131104 | torsin family protein C9orf167 homolog B | NM_001096262 ///<br>NM_001096879 | 0.0220291   | -1.68574 |
| 28278 | XI2.56432.1.S1_at   | LOC10003685<br>3          | hypothetical protein LOC100036853        | NM_001097140                     | 0.0422771   | -1.70019 |
| 11172 | XI2.2424.1.S1_at    | ---                       | ---                                      | ---                              | 0.0218639   | -1.70308 |
| 24415 | XI2.52527.1.S1_at   | ---                       | ---                                      | ---                              | 0.0494173   | -1.71352 |
| 18152 | XI2.440.1.S1_s_at   | fen1 ///<br>LOC398125     | 5' nuclease xFEN1a                       | NM_001087491 ///<br>NM_001088458 | 0.000602365 | -1.73302 |
| 28799 | XI2.56932.1.S1_at   | junb                      | jun B proto-oncogene                     | NM_001097035                     | 0.0141889   | -1.75099 |
| 18231 | XI2.44502.1.S1_at   | ---                       | ---                                      | ---                              | 0.0491934   | -1.75766 |
| 18868 | XI2.4621.1.S1_at    | rhov                      | ras homolog gene family, member U        | NM_001094470                     | 0.0151961   | -1.75811 |
| 2912  | XI2.13354.2.S1_at   | ---                       | ---                                      | ---                              | 0.0304305   | -1.77654 |
| 498   | XI2.1042.1.S1_at    | gli4                      | neural specific DNA binding protein      | NM_001087973                     | 0.00873454  | -1.78129 |
| 13964 | XI2.3023.1.S1_at    | ---                       | ---                                      | ---                              | 0.00745263  | -1.78801 |
| 1196  | XI2.1130.1.S1_at    | ---                       | ---                                      | ---                              | 0.0373393   | -1.82273 |
| 31361 | XI2.862.1.S1_at     | dio3                      | deiodinase, iodothyronine, type 3        | NM_001087863                     | 0.019542    | -1.83475 |
| 25116 | XI2.53187.1.S1_at   | ---                       | ---                                      | ---                              | 0.0400441   | -1.8378  |
| 23007 | XI2.51179.2.A1_at   | ---                       | ---                                      | ---                              | 0.0248996   | -1.85336 |
| 1739  | XI2.12067.1.S1_at   | hes3.3                    | hairy and enhancer of split 3, gene 3    | NM_001088694                     | 0.0290658   | -1.87076 |
| 24921 | XI2.53013.1.S1_at   | ---                       | ---                                      | ---                              | 0.0499449   | -1.87857 |
| 5740  | XI2.16337.3.A1_at   | ---                       | ---                                      | ---                              | 0.0401156   | -1.87962 |
| 12973 | XI2.27263.2.S1_s_at | MGC154351                 | hypothetical protein MGC154351           | NM_001096843                     | 0.0103019   | -1.88691 |
| 573   | XI2.10520.1.A1_at   | LOC10003685<br>3          | hypothetical protein LOC100036853        | NM_001097140                     | 0.0491696   | -1.92889 |
| 10525 | XI2.23567.1.A1_at   | ---                       | ---                                      | ---                              | 0.0427204   | -1.94984 |
| 24807 | XI2.52902.1.S1_at   | rexo1                     | REX1, RNA exonuclease 1 homolog          | ---                              | 0.0162721   | -1.98855 |
| 32368 | XI2.986.1.S1_at     | tnrc4-a                   | CUGBP, Elav-like family member 3         | NM_001086467                     | 0.0492043   | -2.02296 |
| 22691 | XI2.50915.1.S1_at   | ---                       | ---                                      | ---                              | 0.00307993  | -2.0709  |
| 16143 | XI2.34648.1.S1_x_at | tuft1                     | tuffelin 1                               | ---                              | 0.00089525  | -2.10014 |
| 21994 | XI2.50236.1.A1_at   | ---                       | ---                                      | ---                              | 0.0379761   | -2.1298  |
| 8336  | XI2.19593.2.S1_at   | MGC81231                  | Hypothetical protein MGC81231            | NM_001091214                     | 0.0254217   | -2.14907 |
| 18383 | XI2.44964.1.S1_at   | dnajc9                    | DnaJ (Hsp40) homolog                     | NM_001095806                     | 0.0490705   | -2.19815 |
| 29486 | XI2.633.1.S1_a_at   | fzd7                      | frizzled homolog 7                       | NM_001085885                     | 0.0115354   | -2.27646 |
| 29487 | XI2.633.1.S1_at     | fzd7                      | frizzled homolog 7                       | NM_001085885                     | 0.0190327   | -2.43181 |

Table 2 Legend: Embryos were injected at the two-cell stage with *ICDRNA* or with both *MCI-HGR* and *ICD* RNA. At stage 10, animal caps were dissected, incubated until the equivalent of stage 11.5, treated with DEX, and then harvested 5 hours later for total RNA. Two independent experiments produced two sets of RNAs for each condition that were analyzed by hybridization to Affymetrix arrays as described in the Material and Methods. Hybridization results can be found in the GEO repository GSE32452, and analyzed above by pairwise comparison, where fold changes greater than 1.2 fold are shown, with a p value < 0.01.
